1       **The dual role of a multi-heme cytochrome in methanogenesis: MmcA is important for**  
2               **energy conservation and carbon metabolism in *Methanosarcina acetivorans***

3                               Blake E. Downing<sup>1</sup>, Dinesh Gupta<sup>2</sup>, Dipti D. Nayak<sup>2\*</sup>

4

5   Department of Plant and Microbial Biology, University of California, Berkeley, CA, USA<sup>1</sup>;

6   Department of Molecular and Cell Biology, University of California, Berkeley, CA, USA<sup>2</sup>

7

8   Running Head: *In vivo* function of MmcA in *Methanosarcina acetivorans*

9   Keywords: Methane, Methanogens, *Methanosarcina*, Ferredoxin, Cytochromes

10

11   \*Address correspondence to:

12   Dipti D. Nayak ([dnayak@berkeley.edu](mailto:dnayak@berkeley.edu))

13   Department of Molecular and Cell Biology, 1 Barker Hall #3204, University of California,

14   Berkeley, CA 94720-3204

15   Tel: 510-664-5267

16

17

18

19

20

21

22

23

24 **Abstract**

25 Methanogenic archaea belonging to the Order *Methanosarcinales* conserve energy using  
26 an electron transport chain (ETC). In the genetically tractable strain *Methanosarcina*  
27 *acetivorans*, ferredoxin donates electrons to the ETC via the Rnf (**R**hodobacter **n**itrogen **f**ixation)  
28 complex. The Rnf complex in *M. acetivorans*, unlike its counterpart in Bacteria, contains a  
29 multiheme *c*-type cytochrome (MHC) subunit called MmcA. Early studies hypothesized MmcA  
30 is a critical component of Rnf, however recent work posits that the primary role of MmcA is  
31 facilitating extracellular electron transport. To explore the physiological role of MmcA, we  
32 characterized *M. acetivorans* mutants lacking either the entire Rnf complex ( $\Delta rnf$ ) or just the  
33 MmcA subunit ( $\Delta mmcA$ ). Our data show that MmcA is essential for growth during acetoclastic  
34 methanogenesis but neither Rnf nor MmcA are required for methanogenic growth on methylated  
35 compounds. On methylated compounds, the absence of MmcA alone leads to a more severe  
36 growth defect compared to a Rnf deletion likely due to different strategies for ferredoxin  
37 regeneration that arise in each strain. Transcriptomic data suggest that the  $\Delta mmcA$  mutant might  
38 regenerate ferredoxin by upregulating the cytosolic Wood-Ljungdahl pathway for acetyl-CoA  
39 synthesis, whereas the  $\Delta rnf$  mutant may repurpose the F<sub>420</sub> dehydrogenase complex (Fpo) to  
40 regenerate ferredoxin coupled to proton translocation. Beyond energy conservation, the deletion  
41 of Rnf or MmcA leads to some shared and some unique transcriptional changes in  
42 methyltransferase genes and regulatory proteins. Overall, our study provides systems-level  
43 insights into the non-overlapping roles of the Rnf bioenergetic complex and the associated MHC,  
44 MmcA.

## 45 **Importance**

46 Methane is a greenhouse gas that is ten times more potent than carbon dioxide and efforts  
47 to curb emissions are crucial to meet climate goals. Methane emissions primarily stem from the  
48 metabolic activity of microorganisms called methanogenic archaea (methanogens). The electron  
49 transport chain (ETC) in methanogens that belong to the Order *Methanosarcinales* has been the  
50 focus of many *in vitro* studies to date, but the endogenous functions of the bioenergetic  
51 complexes that comprise the ETC have rarely been investigated. In this study, we use genetic  
52 techniques to functionally characterize the Rnf bioenergetic complex and the associated multi-  
53 heme *c*-type cytochrome MmcA in the model methanogen, *Methanosarcina acetivorans*. Our  
54 results show that MmcA and Rnf have shared and unique roles in the cell, and that, contrary to  
55 current knowledge, *M. acetivorans* has the capacity to induce at least two alternative pathways  
56 for ferredoxin regeneration in the absence of a functional Rnf complex.

## 57 **Introduction**

58           The vast majority of methane released to the atmosphere is generated by a group of  
59 microorganisms called methanogens (1). Methanogens belong to the Domain Archaea and  
60 produce methane as a by-product of energy conservation (2). Methanogens are polyphyletic, and  
61 the most widely distributed mode of methanogenic growth uses molecular hydrogen to reduce  
62 carbon dioxide to methane (2, 3). Growth on hydrogen and carbon dioxide (termed  
63 hydrogenotrophic methanogenesis) is a highly conserved and well-characterized seven-step  
64 pathway (Supplementary Figure 1a) (3). A few methanogens, notably members of the Order  
65 *Methanosarcinales*, have an expanded metabolic repertoire that includes growth on small organic  
66 acids like acetate (via acetoclastic methanogenesis) or on methylated compounds like methanol  
67 or methylamines (via methylotrophic methanogenesis) (Supplementary Figure 1b-1e) (2, 4). The  
68 metabolic versatility of the *Methanosarcinales* is linked to the presence of a membrane-bound  
69 electron transport chain (ETC) for energy conservation, which is absent in many other  
70 methanogen lineages (2, 4).

71           In the *Methanosarcinales*, the ETC can be broken down into one or more input modules,  
72 a membrane-bound electron carrier called methanophenazine (MP), and a single output module  
73 (4, 5). The input module(s) serve as an entry point for electrons from a variety of electron donors  
74 and cofactors into the ETC whereas the output module transfers electrons to the terminal electron  
75 acceptor (4). Depending on the strain and the growth substrate, the input module(s) can vary  
76 substantially but the output module remains constant because the terminal electron acceptor is  
77 always a heterodisulfide (CoM-S-S-CoB) of two cofactors, coenzyme M (CoM) and coenzyme B  
78 (CoB) (Figure 1) (3, 4, 6). The CoM-S-S-CoB is generated by the enzyme methyl coenzyme M  
79 reductase (MCR) in the last step of methanogenesis (Supplementary Figure 1) (3, 6).

80 Accordingly, all members of the *Methanosarcinales* encode a membrane-associated  
81 heterodisulfide reductase complex (HdrDE) that serves as the output module of the ETC (4, 7, 8).  
82 HdrDE transfers electrons from reduced MP to CoM-S-S-CoB, regenerating coenzyme M (CoM-  
83 SH) and coenzyme B (CoB-SH) (Figure 1) (7, 9). Concomitantly, oxidation of MP by HdrDE  
84 releases two protons to the pseudoperiplasmic space via a redox loop mechanism (9). In contrast  
85 to the omnipresent HdrDE, the input module(s) of the ETC are diverse and, while resembling  
86 many of their bacterial counterparts, these bioenergetic complexes have many unique features  
87 whose functional ramifications remain poorly characterized.

88         Within the Genus *Methanosarcina*, strains derived from freshwater environments like *M.*  
89 *barkeri* Fusaro rely on hydrogenases for energy conservation via a process termed “hydrogen  
90 cycling” (4, 10–12). However, the marine methanogen *Methanosarcina acetivorans* does not  
91 produce any active hydrogenases, and therefore does not rely on hydrogen cycling for the  
92 generation of an ion motive force (11, 13). Instead, *M. acetivorans* transfers electrons from  
93 reduced cofactors directly to MP via two dedicated bioenergetic complexes: the F<sub>420</sub>  
94 dehydrogenase complex (Fpo) and the *Rhodobacter* nitrogen fixation complex (Rnf) (Figure 1a)  
95 (4, 14, 15). The Fpo complex couples the transfer of electrons between the cytosolic F<sub>420</sub> pool  
96 and the membrane-bound MP pool to the translocation of protons across the membrane (Figure  
97 1a) (4, 16). The Fpo complex is related to Respiratory Complex I (RCI) in the mitochondria of  
98 eukaryotes and the NADH:ubiquinone oxidoreductase (Nuo) from bacteria, except the NADH  
99 interacting module NuoEFG is replaced by the non-orthologous module FpoF (16, 17). In  
100 comparison, the Rnf complex couples the transfer of electrons between ferredoxin and MP to the  
101 translocation of sodium ions across the membrane (Figure 1a) (15, 18, 19). The genetic

102 organization and cellular function of the Rnf complex in methanogens differs substantially from  
103 its bacterial counterparts.

104 In Bacteria, the Rnf complex is composed of six subunits: RnfABCDEG, and preliminary  
105 evidence indicates that electrons flow from reduced Fd to the iron-sulfur clusters of RnfB, then  
106 to the covalently bound flavin mononucleotide (FMN) cofactors of RnfG and RnfD, and finally  
107 to NAD<sup>+</sup> in the cytosol via the iron-sulfur clusters of RnfC (Figure 1c) (20). However, no  
108 structure has been solved for the complex, so additional cofactors involved in electron flow may  
109 be present (20, 21). In addition to the core subunits described above, the *rnf* operon of  
110 methanogens also contains an additional gene that encodes a multi-heme *c*-type cytochrome  
111 (MHC), *mmcA* (Figure 1d) (18, 22). While the known redox cofactor binding sites of RnfB,  
112 RnfD, RnfG and RnfC are conserved in *M. acetivorans*, whether the flow of electrons from Fd  
113 from MP follows the same pathway hypothesized in bacterial systems, and how MmcA is  
114 involved in this process remains unclear (18, 19). Recent evidence indicates that MmcA in *M.*  
115 *acetivorans* might instead act as a conduit for extracellular electron transfer (EET) to external  
116 electron acceptors like anthraquinone-2,6-disulfonate (AQDS), which would substantially  
117 broaden the metabolic repertoire of *M. acetivorans* beyond methanogenic growth (22). While it  
118 is abundantly clear that MmcA plays an important role in the energy metabolism of *M.*  
119 *acetivorans* and other members of the *Methanosarcinales*, the underlying mechanism(s) remains  
120 poorly characterized.

121 In this study, we use a genetic approach to elucidate the *in vivo* function of MmcA in the  
122 model methanogen *M. acetivorans* by comparing the growth and transcriptional responses of  
123 mutant strains lacking the MmcA subunit or the entire Rnf complex. Our results show that  
124 MmcA might have a cellular function beyond facilitating electron flow through the Rnf complex.

125 Our transcriptomic data also shed light on the coupling between substrate-specific  
126 methyltransferases and energy conservation pathways in *M. acetivorans* and bring to light  
127 alternate routes for the regeneration of reduced ferredoxin in the absence of Rnf. Overall, our  
128 work underscores the importance of MmcA in the methanogen Rnf complex and elucidates a  
129 broader role for this multiheme cytochrome during methanogenesis.

## 130 **Results and Discussion**

### 131 **Validation of mutant strains lacking *mmcA* or *rnf* in *Methanosarcina acetivorans***

132 The *rnf* locus in *M. acetivorans* consists of eight ORFs (MA0658 to MA0665) that  
133 encode MmcA and RnfCDGEABX respectively (Figure 2a). The first seven genes have  
134 overlapping coding regions and previous studies have also shown that all eight genes are  
135 transcribed in a single operon (Figure 2a) (18). To characterize the *in vivo* function of the Rnf  
136 complex, we obtained a mutant that has a markerless in-frame deletion in the *M. acetivorans*  
137 chromosome spanning *mmcA* through *rnfX* as described in (23) (Figure 2b). To understand the  
138 function of the MmcA gene in the Rnf complex, we generated a markerless in-frame deletion in  
139 the *mmcA* gene as described previously using Cas9-mediated genome editing (24, 25) (Figure  
140 2c). We sequenced the genome of the  $\Delta mmcA$  mutant and, relative to the parent strain  
141 (WWM60), did not detect mutations elsewhere on the chromosome (Supplementary Table 1).  
142 Based on this evidence, we can conclude that our MmcA deletion strain does not have any off-  
143 target mutations as a result of Cas9 editing or any suppressor mutations to compensate for the  
144 loss of *mmcA*.

145 Since *mmcA* is the first gene in the *rnf* operon, it is likely that deletion of *mmcA* could  
146 alter the expression of the other *rnf* genes. To test for polar effects, we measured the expression  
147 of *rnfCDGEABX* in the  $\Delta mmcA$  mutant and WWM60 using whole-genome RNA sequencing

148 during growth on trimethylamine (TMA) and did not detect significant change in transcript  
149 levels of any of these genes in the absence of *mmcA* (p-value >0.05; Welch's t-test) (Figure 1d).  
150 Thus, knocking out the *mmcA* gene does not alter the transcription of *rnfCDGEABX*. In addition,  
151 we observed that expression of *mmcA in trans* functionally complements the chromosomal  
152 deletion of *mmcA* and restores wildtype growth on TMA (Figure 2e). These growth data indicate  
153 that the RnfCDGEABX proteins are produced in the  $\Delta mmcA$  mutant and that expression of  
154 *mmcA in trans* can reconstitute a functional Rnf complex.

### 155 **Growth characteristics of *rnf* and *mmcA* mutants during methanogenesis on different** 156 **substrates**

157 *In vitro* analyses of the Rnf complex from *M. acetivorans* suggest that MmcA plays an  
158 important role in mediating electron flow between ferredoxin and MP, but the importance of  
159 MmcA for Rnf activity *in vivo*, outside of extracellular electron transfer, has not been well  
160 characterized (22). To address this gap in knowledge, we measured the growth phenotype of  
161 WWM60,  $\Delta rnf$ , and  $\Delta mmcA$  on a wide range of substrates that represent the metabolic breath of  
162 *M. acetivorans*.

163 The Rnf complex as well as MmcA are essential for growth on acetate via acetoclastic  
164 methanogenesis (18, 23, 24). We observed no growth of the  $\Delta rnf$  or  $\Delta mmcA$  mutants on acetate,  
165 while WWM60 with a fully functional Rnf complex was viable (Figure 3a, Table 1). We  
166 attempted to isolate suppressor mutants in the  $\Delta rnf$  or  $\Delta mmcA$  backgrounds that restore growth  
167 on acetate by incubating each strain in growth medium containing acetate as the sole source of  
168 carbon and energy. We did not detect any observable growth (measured as a change in optical  
169 density) for all three replicates of either strain after an incubation period of one year. Together,  
170 these results indicate that the Rnf complex is essential during methanogenesis from acetate for



171 regenerating reduced ferredoxin generated by the carbon monoxide dehydrogenase/acetyl CoA  
172 synthase (CODH/ACS) complex (18, 26, 27). In addition, the MHC subunit MmcA is vital for  
173 the functionality of the Rnf complex. Our growth data for the  $\Delta mmcA$  mutant on acetate agree  
174 with previous work from our group, but are in contrast a previous study where a *mmcA* deletion  
175 mutant of *M. acetivorans* had no growth defect on acetate compared to the corresponding parent  
176 strain (22, 24). We suspect that the difference in phenotype observed may pertain to differences  
177 in the genetic techniques used for generating deletion mutants, or the presence of a suppressor  
178 mutation in the *mmcA* deletion strain generated in the previous work (22).

179         Next, we tested the role of Rnf and MmcA during methylotrophic methanogenesis by  
180 measuring the growth phenotype of the mutants and the parent strain on three different  
181 methylated compounds: trimethylamine (TMA), methanol (MeOH), and dimethylsulfide (DMS)  
182 (14, 28–30). The  $\Delta rnf$  mutant and the  $\Delta mmcA$  mutant were viable on all three methylated  
183 compounds, but we noted a significant defect in the growth rate of both mutants relative to  
184 WWM60 (Figure 3b, Table 1). Additionally, the  $\Delta mmcA$  mutant had a significantly higher  
185 growth defect compared to the  $\Delta rnf$  mutant on all methylated compounds (Figure 3; Table 1).  
186 Based on these data, we can conclude that tMmcA and other components of the Rnf complex are  
187 not essential for methylotrophic methanogenesis in *M. acetivorans* but are important for optimal  
188 growth under these conditions.

189         The phenotypes of the  $\Delta rnf$  and  $\Delta mmcA$  strains also differed when switching between  
190 methylotrophic substrates. We observed that the  $\Delta rnf$  mutant had a significantly shorter lag time  
191 switching from medium containing TMA to medium with DMS relative to both WWM60 and  
192 the  $\Delta mmcA$  mutant (Figure 4a; Table 2). The lag time of the  $\Delta mmcA$  mutant is not significantly  
193 different from the WT strain (Figure 4a; Table 2), further supporting the hypothesis that Rnf

194 proteins are expressed in the absence of MmcA during methylotrophic growth. Based on these  
195 data, we hypothesize that loss of the Rnf complex, but not MmcA alone, might result in a  
196 transcriptional response tuning the expression of methyltransferases (such as *mtsD*, *mtsF*, and  
197 *mtsH*) that are required for growth on methylated sulfur compounds like DMS (30). However,  
198 the sensory and regulatory pathway(s) by which this transcriptional response is carried out  
199 cannot be inferred from these data.

200 As the growth defect for the  $\Delta mmcA$  mutant on methylated compounds was significantly  
201 exacerbated compared to the  $\Delta rnf$  mutant (Figure 3), it is likely that, in addition to being an  
202 important part of the Rnf complex in methanogens, MmcA may have other physiological roles  
203 too. To test for a Rnf-independent function of MmcA during methylotrophic methanogenesis, we  
204 generated a strain encoding the *mmcA* gene on a plasmid in the  $\Delta rnf$  background (Figure 4b) and  
205 measured the growth of this mutant on TMA relative to a control strain carrying an empty vector.  
206 Indeed, expression of *mmcA* in the  $\Delta rnf$  background enhanced growth rate compared to the  
207 control strain by 22% [p-value = 0.0023; Welch's t-test] (Figure 4b and Supplementary Table 2).  
208 Growth yield of the  $\Delta rnf$  strain expressing *mmcA* was not significantly different than the control  
209 strain (Supplementary Table 2). These phenotypic data provide clear evidence that the  
210 physiological role of MmcA during methanogenesis from methylated compounds extends  
211 beyond its capacity to relaying electrons through the Rnf complex.

### 212 **Differential expression of Fpo and methylamine methyltransferases lead to differential** 213 **growth of the $\Delta rnf$ and $\Delta mmcA$ mutants**

214 Based on our growth data, it is clear that the cellular function of the Rnf complex does  
215 not completely overlap with the MHC subunit, MmcA, during methylotrophic growth. To  
216 understand the genetic basis for this phenotypic distinction, we performed whole genome RNA

217 sequencing of the  $\Delta rnf$  mutant, the  $\Delta mmcA$  mutant and WWM60 at mid-exponential growth on  
218 TMA. To identify genes that are “differentially expressed”, we used the following the criteria: a  
219  $\log_2$ -fold change in transcript abundance  $\geq 2$  (4-fold) with a q-value (corrected p-value)  $\leq 0.01$   
220 (see Materials and Methods). The  $\Delta rnf$  mutant had significantly higher expression of genes  
221 involved in two distinct aspects of methanogenic metabolism relative to the  $\Delta mmcA$  mutant  
222 (Figure 5a). First, we observed significantly higher transcripts for several genes encoding the  
223  $F_{420}$  methanophenazine oxidoreductase (Fpo) bioenergetic complex. The membrane bound Fpo  
224 complex is comprised of thirteen subunits and, during methylotrophic growth, catalyzes the  
225 transfer of electrons from reduced  $F_{420}$  to MP coupled to the translocation of two protons across  
226 the membrane (Figure 1) (16). Most of the genes comprising the Fpo complex are encoded in the  
227 *fpoABCDHIJIKLMNO* operon (Figure 5b) (16, 31). The  $F_{420}$  input module *fpoF* is found  
228 elsewhere on the chromosome in putative operon with the  $F_{420}$ -dependent N(5),N(10)-methylene  
229 tetrahydromethanopterin reductase (*mer*), and a second copy of *fpoO2* is encoded close to the  
230 *fpoA-O* operon, although neither paralog has a known function (Figure 5b) (31). Five genes in  
231 the *fpo* operon (*fpoJ2*, *fpoL*, *fpoM*, *fpoN*, and *fpoO*) as well as *fpoO2* had  $\geq 4$ -fold (or 2  $\log_2$ -fold)  
232 higher expression in the  $\Delta rnf$  background compared to the  $\Delta mmcA$  mutant (Figure 5b;  
233 Supplementary Table 3). No significant change in expression was observed for *fpoF*  
234 (Supplementary Table 3). Thus, we hypothesize that a “headless” or modified form of Fpo that  
235 lacks the  $F_{420}$  interacting module FpoF is more abundant in the  $\Delta rnf$  mutant. The “headless” Fpo  
236 complex has been hypothesized to function as a ferredoxin: MP oxidoreductase in other  
237 methanogens, like members of the Genus *Methanotherix* (previously known as Genus  
238 *Methanosaeta*) that lack both the Ech hydrogenase as well as the Rnf complex (32). While  
239 previous studies have suggested that FpoO plays a role in transferring electrons from the Fpo

240 complex to the MP pool via a [2Fe-2S] cluster, we hypothesize that the FpoO subunit might  
241 instead interact with the FpoF subunit and/or with ferredoxin directly (31). It is possible that the  
242 two copies of FpoO encoded in the *M. acetivorans* genome differ in their affinity for FpoF  
243 versus ferredoxin, which might further modulate the specificity of the Fpo complex for different  
244 electron carriers. Altogether, we postulate that higher expression of other subunits of the Fpo  
245 complex relative to FpoF and tuning the amount of FpoO2 relative to FpoO1 increases the  
246 proportion of the “headless” Fpo complex in the  $\Delta rnf$  mutant (Supplementary Figure 2). The  
247 “headless” Fpo complex might provide an alternate route for ferredoxin regeneration in the  $\Delta rnf$   
248 mutant that ultimately leads to faster growth under methylothetic conditions compared to the  
249  $\Delta mmcA$  mutant. The RNA sequencing data do not allow us to discriminate whether the Fpo  
250 genes are upregulated in the  $\Delta rnf$  mutant or downregulated in the  $\Delta mmcA$  mutant. To distinguish  
251 between these two modes of regulation, we compared the expression of the Fpo locus in each  
252 mutant relative to WWM60. The Fpo genes were more highly expressed in the  $\Delta rnf$  mutant, but  
253 not in the  $\Delta mmcA$  mutant, compared to WWM60, however the change in expression for both  
254 mutants did not meet our  $\geq 2$  log<sub>2</sub>-fold threshold value. Thus, our data suggest the loss of Rnf  
255 might result in upregulation of Fpo (Supplementary Table 3), but we cannot confidently identify  
256 a mode of regulation that causes a differential expression of the Fpo genes in the  $\Delta rnf$  strain  
257 relative to the  $\Delta mmcA$  strain at present.

258 In addition to the Fpo genes, we also observed significantly higher expression of multiple  
259 genetic loci that encode TMA, DMA (dimethylamine), and MMA (monomethylamine)  
260 methylamine methyltransferases as well as permeases putatively involved in the transport of  
261 these methylated amines in the  $\Delta rnf$  mutant relative to the  $\Delta mmcA$  mutant (Figure 5a, 5c;  
262 Supplementary Table 4) (33, 34). Differential expression of these genes could lead to a

263 commensurate change in the rate of transport and conversion of methylated amines to methyl-  
264 coenzyme M, an intermediate that feeds into the core methanogenic pathway, which ultimately  
265 would affect cell growth as observed in Figure 3. To determine if transcription of these loci was  
266 induced in the  $\Delta rnf$  mutant or restricted in the  $\Delta mmcA$  mutant, we compared the expression of  
267 these genes in each mutant relative to WWM60 independently. While we did not detect any  
268 significant change in transcript levels of any of these genes in the  $\Delta rnf$  mutant relative to  
269 WWM60, whereas most of these genes had 4 to 5-fold higher expression in WWM60 relative to  
270 the  $\Delta mmcA$  mutant (Supplementary Table 4). These data strongly suggest that the  
271 methyltransferase loci are downregulated only when the *mmcA* locus is deleted but not when the  
272 entire the entire *rnf* locus is deleted. While the mechanistic details of this regulatory process are  
273 beyond the scope of this work, these data bring to light previously unknown global mechanisms  
274 in methanogens that coordinate the expression of genes involved in energy conservation (such as  
275 *mmcA* and *rnf*) with genes involved in carbon metabolism (such as the *mttCB*, *mtbCB*, *mtmCB*  
276 methyltransferases involved in growth on TMA, DMA, and MMA, respectively) (33, 34).

277

278 Nearly forty genes had significantly higher expression in the  $\Delta mmcA$  mutant relative to  
279 the  $\Delta rnf$  mutant and these could be divided into three categories: a) genes that were globally  
280 upregulated in the  $\Delta mmcA$  mutant, i.e. these genes were also expressed to a higher level in the  
281  $\Delta mmcA$  mutant relative to WWM60, b) genes that were globally downregulated in the  $\Delta rnf$   
282 mutant i.e. genes that also had a lower expression in the  $\Delta rnf$  mutant compared to WWM60, and  
283 c) genes that were only expressed to a higher degree in the  $\Delta mmcA$  mutant relative to the  $\Delta rnf$   
284 mutant, i.e. genes that were not differentially expressed when comparing either mutant to  
285 WWM60 (Supplementary Table 5). Of the six genes in the first category, four lacked any

286 recognizable motifs or domains and the other two encode proteins involved in the biosynthesis of  
287 asparagine (*asnB*) and post-translational modification of proteins (O-linked N-acetylglucosamine  
288 transferase) (Supplementary Table 5) (35, 36). At present, a connection between MmcA and  
289 these proteins remains elusive.

290         About twenty genes were consistently downregulated in the  $\Delta rnf$  mutant and this list  
291 includes *rnfCDGEABX* (which validates our methods for identifying changes in transcription),  
292 biosynthetic genes, and several genes likely involved in transcriptional regulation  
293 (Supplementary Table 5). Downregulated biosynthetic genes included *thiC* (MA4010), a UbiA  
294 prenyltransferase domain containing protein, which catalyzes the synthesis of lipophilic  
295 compounds that serve as electron carriers in the ETC (37, 38). We hypothesize *ubiA* is involved  
296 in the biosynthesis of MP and, in the absence of Rnf, transcription is reduced to modulate levels  
297 of MP in the membrane. This hypothesis agrees with a previous study where *ubiA* and other  
298 predicted ubiquinone/menaquinone biosynthetic genes were proposed to be involved in MP  
299 synthesis and more highly expressed in *M. barkeri* during direct interspecies electron transfer  
300 (DIET) to facilitate extracellular electron transport through the membrane (38). Other  
301 downregulated biosynthetic genes included a putative operon with an acyl carrier protein and a  
302 long chain fatty acyl CoA ligase (MA1027-MA1029). We also observed downregulation of  
303 several regulatory genes included an ArsR family transcriptional regulator (MA0504), a response  
304 regulator (MA4671), as well as a protein with a DNA-binding helix-turn-helix motif (MA4484)  
305 (Supplementary Table 5). The targets of the various regulatory proteins are unknown but might  
306 be one of biosynthetic genes mentioned above or the DMS specific methyltransferases, based on  
307 the shortened lag time observed in Figure 3d.

308 Finally, a set of thirteen genes had higher expression only in the  $\Delta mmcA$  mutant relative  
309 to the  $\Delta rnf$  strain but were not differentially expressed in comparison to WWM60  
310 (Supplementary Table 5). This list includes signaling proteins like a sensory transduction  
311 histidine kinase (MA2256), regulatory genes such as *nikR*, a nickel-responsive transcriptional  
312 regulator that controls the expression of nickel-containing enzymes, and cofactor biosynthetic  
313 genes like *nadE*, which encodes NAD synthetase that catalyzes the last step in NAD biosynthesis  
314 (39, 40). It is tempting to speculate that the signaling proteins or the regulators identified above  
315 are linked to the downregulation of the methylamine specific methyltransferases in the  $\Delta mmcA$   
316 strain (Figure 5c; Supplementary Table 4), however detailed mechanistic analyses would be  
317 needed to bolster this observation in future work.

318 Overall, our RNA-sequencing analyses provided clear insights into the genetic basis of  
319 the phenotypic distinctions between the  $\Delta mmcA$  strain and the  $\Delta rnf$  strain observed in Figure 3.  
320 Downregulation of substrate specific methyltransferases and lower levels of the “headless” Fpo  
321 complex, which can potentially regenerate reduced ferredoxin, leads to a more severe growth  
322 defect for the  $\Delta mmcA$  mutant relative to the  $\Delta rnf$  mutant on methylated substrates.

### 323 **Novel routes for generating a Na<sup>+</sup> ion gradient and regenerating ferredoxin enable** 324 **methylotrophic growth in the absence of a functional Rnf complex**

325 To understand how the  $\Delta rnf$  and  $\Delta mmcA$  mutants sustain growth on methylated  
326 compounds and the physiological basis for the fitness defect they incur (Figure 3), we compared  
327 the transcriptomic profile of each mutant in mid-exponential phase on TMA to that of WWM60  
328 under the same growth conditions (Figure 6a and Figure 6b). Genes were classified as being  
329 “differentially expressed” if they met the same criteria listed above. The expression level of

330 genes in WWM60 was considered to be the baseline, so genes with significantly higher or lower  
331 transcript levels in the mutants were considered to be upregulated or downregulated respectively.

332 Only thirteen genes were upregulated and twenty-four genes were downregulated in both  
333 mutants compared to WWM60 (Supplementary Table 6). The upregulated genes belonged to  
334 three distinct gene clusters (Figure 6a and Figure 6b). First, with the exception of *pstS*, all other  
335 genes of the high-affinity phosphate (Pi) transport system (*pstSCAB-phoU*) and alkaline  
336 phosphatase (*phoA*) were upregulated between 4.0 to 12-fold in the mutants (Supplementary  
337 Table 6) (41). Previous studies with *M. mazei* have shown that cells experiencing Pi starvation  
338 upregulate *pstSCAB-phoU* as well as *phoA* (41). Here, we anticipate that these mutants have  
339 upregulated the phosphate transport and hydrolysis genes to meet an increased cellular demand  
340 for Pi despite slower growth. We suspect that the excess Pi might be needed for ATP synthesis or  
341 biosynthesis of methanogenic cofactors, such as tetrahydrosarcinopterin (H<sub>4</sub>SPT) and coenzyme  
342 B. The *M. acetivorans* genome also encodes a low-affinity Pi transport system (MA2934-  
343 MA2935) that was not differentially expressed in these strains (Supplementary Table 7) (42).  
344 Next, several genes in the operon encoding the F<sub>1</sub>F<sub>0</sub> ATP synthase were upregulated by 4.0 to  
345 8.0-fold in both mutants (Figure 6c; Supplementary Table 6). *M. acetivorans* encodes two  
346 different ATP synthases: an archaeal A<sub>1</sub>A<sub>0</sub> ATP synthase (MA4152-MA4160), which can  
347 translocate H<sup>+</sup> ions and Na<sup>+</sup> ions concomitantly, that is essential for growth (43), as well as a  
348 bacterial F<sub>1</sub>F<sub>0</sub> ATP synthase (MA2433-MA2441) that is dispensable during methylotrophic  
349 methanogenesis and is hypothesized to only translocate Na<sup>+</sup> ions (44). During methylotrophic  
350 growth, the Rnf complex generates a Na<sup>+</sup> gradient that is used for: a) ATP synthesis by the  
351 promiscuous A<sub>1</sub>A<sub>0</sub> ATP synthase and b) the endergonic transfer of the methyl group from  
352 methyl-CoM to H<sub>4</sub>SPT catalyzed by N<sup>5</sup>-methyl-H<sub>4</sub>SPT (CH<sub>3</sub>-H<sub>4</sub>SPT): Coenzyme M (CoM)



353 methyltransferase (Mtr) (Supplemental Figure 1) (3, 43). In the absence of a functional Rnf  
354 complex, we hypothesize that the  $A_1A_0$  ATP synthase relies solely on the proton gradient  
355 generated by Fpo and HdrDE for ATP synthesis and the  $F_1F_0$  ATP synthase is upregulated to  
356 generate a  $Na^+$  gradient via ATP hydrolysis, which can then be used for the endergonic reaction  
357 catalyzed by Mtr. Our hypothesis is further corroborated by the observation that the upregulated  
358 genes in the  $F_1F_0$  ATP synthase locus are either involved in the assembly of the membrane-  
359 embedded  $F_0$  domain (*atpI*; MA2439) or encode the ‘a’ subunit (*atpB*; MA2437) and the ‘c’ ring  
360 (*atpE*; MA2436) of the  $F_0$  complex that bind and translocate  $Na^+$  ions (44, 45). In a previous  
361 study, a multi-subunit  $Na^+/H^+$  antiporter (encoded by the Mrp locus) was shown to play an  
362 important role in coupling growth and methanogenesis by generating an optimal  $Na^+/H^+$  gradient  
363 for efficient ATP synthesis on acetate (46). We did not observe a significant change in the  
364 expression of the Mrp locus in either mutant (Supplementary Table 7). Thus, the putative role of  
365 the  $F_0F_1$  synthase in generating a  $Na^+$  gradient in the  $\Delta rnf$  and the  $\Delta mmcA$  mutants is non-  
366 overlapping with the cellular function of Mrp and other  $Na^+/H^+$  antiporters, and potentially  
367 highlights different strategies for balancing ion gradients depending on the methanogenic  
368 substrate. Finally, the *mtpCAP* locus was upregulated by 8 to 11-fold in the  $\Delta rnf$  mutant and by  
369 16 to 22-fold in the  $\Delta mmcA$  mutant (Supplementary Table 6). Recent studies have shown that the  
370 *mtpCAP* locus is involved in the transport and catabolism of the methylated sulfur compound  
371 methylmercaptopropionate (MMPA) in *M. acetivorans* (47), however no MMPA was present in  
372 our growth media. At present, neither the cause for upregulation of the *mtpCAP*  
373 methyltransferase system nor its effect on the physiology of the mutants is clear. However, this  
374 observation demonstrates the intricate coupling between methyltransferase regulation and energy  
375 conservation in methanogens. Genes that are downregulated in the two mutants have core

376 housekeeping functions and we anticipate that the differential expression of these loci is a  
377 consequence of slower growth in the mutants (Supplementary Table 6).

378 Next, we analyzed the subset of genes that were differentially expressed in only one of  
379 the two mutants. In the  $\Delta rnf$  mutant, three genes were upregulated and ten genes were  
380 downregulated in comparison to WWM60 (Supplementary Table 8). Oddly, the *hypF* gene  
381 involved in the maturation of hydrogenases (48) was upregulated 6.5-fold, even though *M.*  
382 *acetivorans* lacks any detectable hydrogenase activity during methylotrophic growth conditions  
383 (13). In addition, the *kefC* locus encoding a putative glutathione regulated  $K^+$  efflux system was  
384 also upregulated 4-fold in the  $\Delta rnf$  mutant. KefC has been shown to transport  $Li^+$  and  $Na^+$  ions  
385 (49), therefore we hypothesize that this locus might also aid in establishing a  $Na^+$  ion gradient in  
386 the absence of Rnf. Apart from some genes encoding the pseudo periplasmic substrate binding  
387 protein of various ABC transporters, the majority of genes uniquely downregulated in the  $\Delta rnf$   
388 mutant compared to WWM60 did not have a recognizable functional motif (Supplementary  
389 Table 8).

390 In contrast to the  $\Delta rnf$  mutant, a substantially larger number of genes are uniquely  
391 induced or suppressed in the  $\Delta mmcA$  mutant (Supplementary Table 9). Among the genes that are  
392 upregulated, a few loci are particularly notable. First, genes encoding the carbon monoxide  
393 dehydrogenase/acetyl CoA synthase (CODH/ACS) enzyme are upregulated by 4.0 to 7.0-fold.  
394 *M. acetivorans* contains two isoforms of CODH/ACS that are encoded by the *cdh1* and *cdh2*  
395 operons (Figure 6d) (50). Our initial analysis indicated that five subunits of *cdh1* (*cdhA1*, *cdhB1*,  
396 *cdhC1*, *cooC1*, and *cdhD1*) and three subunits of *cdh2* (*cdhC2*, *cooC2*, *cdhD2*) are upregulated in  
397 the  $\Delta mmcA$  mutant. Upon closer inspection, we noticed that the two *cdhA* and *cdhB* homologs  
398 are relatively divergent at the sequence level (~80% amino acid identity) whereas the *cdhC*,

399 *cooC*, *cdhD* homologs share >97% amino acid identity (14). Thus, the upregulation of the latter  
400 set in *cdh2* could be an artefact of the RNA-sequencing analysis pipeline, similar to previous  
401 reports of transcript cross-reactivity between *cdh* operons in *M. mazei* (51). Regardless, both  
402 isoforms are known to be functionally redundant and can catalyze the catabolism of acetate  
403 during acetoclastic methanogenesis or anabolic acetyl-CoA synthesis by the Wood-Ljungdahl  
404 (WL) pathway during methylotrophic growth (50). Since carbon fixation by the WL pathway  
405 requires reduced ferredoxin, increased expression of CODH/ACS could serve as an alternate  
406 route for regenerating reduced ferredoxin in the absence of a functional Rnf complex in the  
407  $\Delta mmcA$  mutant. A 4.0-fold increase in expression of the regulatory protein encoded by the *mreA*  
408 locus in the  $\Delta mmcA$  mutant is likely linked to the upregulation of *cdh1*. MreA is a global  
409 regulator of methanogenic pathways in *M. acetivorans* and has been shown to activate genes  
410 important for acetoclastic methanogenesis (such as *cdh1*) and to repress transcription of genes  
411 that play a crucial role in methylotrophic methanogenesis (including the methylamine-specific  
412 methyltransferases and the *fpo* locus) (Figure 5b and Figure 5c) (52). In a previous study, the  
413 *ack/pta* locus encoding acetate kinase and phosphate acetyltransferase were downregulated in a  
414  $\Delta mreA$  strain, however we did not observe any significant change in the expression of these loci  
415 in the  $\Delta mmcA$  mutant (Supplementary Table 7) (52). Thus, it is likely that other regulators in  
416 addition to MreA are also involved in the upregulation of genes required for the catabolism of  
417 acetate. We also observed a 5.6-fold increase in expression of a gene encoding a bile acid: Na<sup>+</sup>  
418 symporter family protein (MA2632) in the  $\Delta mmcA$  mutant, which may be linked to the  
419 maintenance of the Na<sup>+</sup> ion gradient across the membrane. Among the genes that were  
420 significantly downregulated in the  $\Delta mmcA$  mutant, two loci are of particular interest. First, the  
421 *pylBCD* locus involved the biosynthesis of the 22<sup>nd</sup> amino acid, pyrrolysine (Pyl), is

422 downregulated by 4.0 to 4.6-fold (53). Whether the *pyl* genes are a part of the same regulon as  
423 the concomitantly downregulated methylamine methyltransferases (Figure 5c) or if the  
424 expression of the *pyl* genes is controlled by the amount of the methylamine methyltransferases  
425 remains unclear. Next, two genes (*cfbA* and *cfbE*) involved in the biosynthesis of Factor 430  
426 (F<sub>430</sub>), a Ni-containing cofactor associated with MCR, were downregulated significantly (54, 55).  
427 Downregulation of F<sub>430</sub> production might free up more Ni for increased production of the Ni-  
428 containing CODH/ACS enzyme in  $\Delta mmcA$  mutant.

## 429 **Conclusions**

430 The acquisition of an ETC likely spurred rampant ecological diversification in members  
431 of the Order *Methanosarcinales*. For several decades, the bioenergetic complexes that comprise  
432 the ETC in these archaea were studied in isolation using *in vitro* techniques. While these studies  
433 have provided substantial insights into the biochemical mechanisms that facilitate electron  
434 transfer reactions, an *in vivo* perspective on the ETC and its interplay with metabolism has been  
435 lacking. In this study, we performed comprehensive genetic, phenotypic, and transcriptomic  
436 analyses of *M. acetivorans* mutants that either lack the entire Rnf bioenergetic complex or a just  
437 a single subunit encoding an MHC called MmcA. Our growth analyses are congruent with a  
438 previous study, which also demonstrated that Rnf complex is essential for growth on acetate but  
439 not on methylated compounds (15). Our transcriptomic analyses provide evidence of potential  
440 alternative mechanisms for ferredoxin regeneration in each mutant (Figure 5b and Figure 6b). In  
441 the  $\Delta rnf$  mutant, a “headless” Fpo complex might serve as a new entry point for electrons from  
442 ferredoxin (Figure 5b; Supplementary Figure 2) in the ETC (32), whereas acetyl CoA synthesis  
443 mediated by CODH/ACS could possibly regenerate the reduced ferredoxin pool the  $\Delta mmcA$   
444 mutant (Figure 6b) (26). The “headless” Fpo backup strategy is coupled to proton translocation

445 and would theoretically conserve more energy for the  $\Delta rnf$  mutant compared to the CODH/ACS  
446 strategy in the  $\Delta mmcA$  mutant. Accordingly, the  $\Delta rnf$  mutant has faster growth rate than then  
447  $\Delta mmcA$  mutants on methylated compounds (Figure 3). We anticipate that the potential  
448 alternative strategies for ferredoxin regeneration stem from distinct regulatory responses by the  
449 cell to the loss of either MmcA or the entire Rnf complex. Our transcriptomic data corroborates  
450 this hypothesis, in which we saw upregulation of the global methanogenesis protein MreA in the  
451  $\Delta mmcA$  mutant but not the  $\Delta rnf$  mutant (Figure 6; Supplementary Table 9). Higher expression of  
452 MreA would lower the expression of *fpo* locus in the  $\Delta mmcA$  mutant during methylotrophic  
453 methanogenesis (52). Similarly, induction of MreA during acetoclastic growth might also  
454 explain the lethal phenotype for both mutants (52). These data showcase the sheer diversity of  
455 energy conservation strategies present in *M. acetivorans*, and likely other members of the  
456 *Methanosarcinales*, which enable these organisms to thrive in a wide array of ecological niches.

457 Additionally, based on our phenotypic (Figure 3 and Figure 4) and transcriptomic  
458 analyses (Figures 5 and Figure 6), we observe that the impact of deleting the Rnf complex or  
459 MmcA extends far beyond energy conservation in the cell. Genes involved in Na<sup>+</sup> ion transport,  
460 amino acid biosynthetic pathways, substrate specific methyltransferases for methylotrophic  
461 methanogenesis, transcriptional regulators, and many other loci were differentially expressed in  
462 one or both mutants (Figure 5 and Figure 6). These dramatic transcriptional changes underscore  
463 a complex and intricate regulatory network that connects carbon transformation by  
464 methyltransferases and energy conservation during methanogenic growth. Further analyses of  
465 regulatory genes identified in this work and similar studies with other components of the ETC  
466 will ultimately provide systems-level insights into methanogenesis in *Methanosarcina*  
467 *acetivorans*, and will deepen our understanding of these ecologically-relevant microbes.

## 468 **Materials and Methods**

469 **Media and culture conditions.** All *Methanosarcina* strains were grown at 37°C without shaking  
470 in bicarbonate-buffered high-salt (HS) liquid medium containing either 50 mM trimethylamine  
471 hydrochloride (TMA), 125 mM methanol, 40 mM sodium acetate, or 20 mM dimethylsulfide  
472 (DMS) as a growth substrate (56). TMA, methanol, and acetate were added prior to autoclaving  
473 whereas DMS was added after autoclaving from a 200 mM stock solution prepared in HS  
474 medium with no other carbon sources. For mutant generation, the growth medium contained 50  
475 mM TMA as the growth substrate and agar solidified HS + TMA media was obtained by adding  
476 1.5% w/v agar (Sigma-Aldrich, St. Louis, MO, USA). To select for transformants, puromycin  
477 (Pur) (RPI, Mount Prospect, IL, USA) was added to HS + TMA agar medium before  
478 solidification to a final concentration of 2 µg/mL from a 1000X sterile, anaerobic stock solution  
479 with N<sub>2</sub> gas in the headspace at 55-69 kPa. HS + TMA + Pur agar plates were incubated at 37°C  
480 in an intra-chamber anaerobic incubator with N<sub>2</sub>/CO<sub>2</sub>/H<sub>2</sub>S (79.9%/20%/0.1%) in the headspace,  
481 as described previously (57). All *Escherichia coli* strains were grown in Lysogeny broth (LB) at  
482 37°C in a shaking incubator (Thermo Fisher Scientific, Waltham, MA, USA) at 250 rpm. To  
483 select for the desired plasmids, antibiotics were added to cultures to final concentrations of 25  
484 µg/mL for kanamycin, and/or 10 µg/mL for chloramphenicol as listed in Supplementary Table  
485 10. For plasmid extraction, rhamnose was added to a final concentration of 10 mM to *E. coli*  
486 cultures prior to incubation to increase the plasmid copy number of pDN201- and pJK029A-  
487 derived plasmids.

488 **Construction of *Methanosarcina acetivorans* mutants.** Liposome-mediated transformation of  
489 *M. acetivorans* was performed as previously described (58). Briefly, 20 mL of late-exponential  
490 phase (~0.8 OD<sub>600</sub>) cultures growing on HS + TMA were harvested by centrifugation, the

491 supernatant was decanted, and the cell pellet was resuspended in 1 mL of anaerobic bicarbonate-  
492 buffered, isotonic sucrose (pH = 7.4) containing 100  $\mu$ M cysteine. Next, 25  $\mu$ L of N-[1-(2,3-  
493 Dioleoyloxy)propyl]-N,N,N-trimethylammonium methylsulfate (DOTAP) (Roche Diagnostics  
494 Deutschland GmbH, Mannheim, Germany) and 2  $\mu$ g of plasmid DNA were incubated for 30  
495 mins in 75  $\mu$ L of buffered, isotonic sucrose to allow for DNA uptake into liposomes. After  
496 incubation, the DOTAP + DNA mixture was added in full to the cell suspensions. Suspensions of  
497 cells + DOTAP + DNA were incubated for 4 hours at room temperature in an anaerobic chamber  
498 with CO<sub>2</sub>/H<sub>2</sub>/N<sub>2</sub> (10/5/85) in the headspace before inoculation into 10 mL of HS + TMA.  
499 Outgrowths of transformed cells were incubated at 37°C for 12-16 hours before plating on agar-  
500 solidified HS + Pur + TMA using a sterile spreader (56). Plasmids used for mutant generation are  
501 described in Supplementary Table 10. Mutant colonies were genotyped using primers detailed in  
502 Supplementary Table 11, and a full list of strains used in this study is provided in Supplementary  
503 Table 12.

504 **Growth Assays for *Methanosarcina acetivorans* mutants.** For growth analysis, 11 mL cultures  
505 were grown at 37°C without shaking (HeraTherm™ General Protocol Microbiological Incubator,  
506 Thermo Fisher Scientific, Waltham, MA, USA) in Balch tubes with N<sub>2</sub>/CO<sub>2</sub> (80/20) at 55-69 kPa  
507 in the headspace. Growth of three independent biological replicates was measured by  
508 determining the optical density of cultures at 600nm (OD<sub>600</sub>) using a UV-Vis Spectrophotometer  
509 (Gensys 50, Thermo Fisher Scientific, Waltham, MA, USA). A Balch tube containing 10 mL of  
510 HS medium with the appropriate growth substrate was used as a ‘blank’ for optical density  
511 measurements. For growth on TMA or methanol, cells were acclimated to the growth substrate  
512 for a minimum of four generations prior to quantitative growth measurements. Growth  
513 measurements on acetate and DMS were performed with cells previously grown on TMA.

514 Approximately 1 mL of late exponential phase culture was harvested and served as the inoculum  
515 into 10 mL of fresh medium for growth analyses. Growth data were log<sub>10</sub>-transformed and  
516 plotted versus time. A linear regression was fitted to the data to include at least 5 data points on  
517 the growth curve for a regression coefficient ( $R^2$ )  $\geq 0.97$ . Growth rate (gr) was calculated as the  
518 slope of the linear fit multiplied by 2.303, and the doubling time was calculated as  $T_d =$   
519  $0.6932/\text{gr}$ . Lag time was calculated by subtracting the Y-intercept value from the log<sub>10</sub>-  
520 transformed initial OD<sub>600</sub> reading and dividing by the slope of the linear fit. For maximum OD<sub>600</sub>  
521 measurements, approximately 1 mL of early stationary phase culture was harvested and diluted  
522 into 10 mL of fresh HS medium containing the same substrate used for growth. An OD<sub>600</sub>  
523 measurement of the diluted culture was then multiplied by 11 to approximate the maximum  
524 OD<sub>600</sub> value. Growth curve plots, determination of doubling time, lag time, and statistical  
525 analyses were obtained using Microsoft Excel Version 16.55. Plots of OD<sub>600</sub> versus time were  
526 generated using GraphPad/Prism 9.3.1.

527 **DNA extraction and sequencing.** Cells from a 10 ml culture of DDN009 (*ΔmmcA*) incubated in  
528 in HS + TMA at 37 °C were harvested at late-exponential phase (OD<sub>600</sub> ~0.8) for genomic DNA  
529 extraction using the Qiagen blood and tissue kit (Qiagen, Hilden, Germany). The concentration  
530 of genomic DNA was measured using a Nanodrop One Microvolume UV-Vis Spectrophotometer  
531 (Thermo Scientific, Waltham, MA, USA). Genomic DNA was shipped to the Microbial Genome  
532 Sequencing Center, Pittsburgh, PA, USA, where sequencing libraries preparation and sequencing  
533 was performed. Sequencing reads were aligned to the *Methanosarcina acetivorans* C2A genome  
534 and mutations were identified using Breseq version 0.35.5. Illumina sequencing reads for  
535 DDN009 have been deposited to the Sequencing Reads Archive (SRA) and the BioProject  
536 accession number will be made available upon publication.



537 **RNA extraction and sequencing.** WWM60 (parent), WWM1015 (*Δrnf*) and DDN009 (*ΔmmcA*)  
538 pre-acclimated on TMA were inoculated in quadruplicate from late exponential phase cultures  
539 (OD<sub>600</sub> ~0.8) into 10mL of fresh HS + TMA in Balch tubes with N<sub>2</sub>/CO<sub>2</sub> (80/20) at 55-69 kPa in  
540 the headspace and grown at 37°C without shaking (Isotemp™ Microbiological Incubator,  
541 Thermo Fisher Scientific, Waltham, MA, USA). One Balch tube was used to monitor growth as  
542 a proxy for the other replicates by measuring the OD<sub>600</sub> routinely using a UV-Vis  
543 Spectrophotometer (Gensys 50, Thermo Fisher Scientific, Waltham, MA, USA). Once the  
544 measured OD<sub>600</sub> reached approximately ½ maximum value (0.750-0.850), RNA was harvested  
545 from the remaining three culture tubes. For RNA extraction, 1 mL of culture was added to 1 mL  
546 of Trizol pre-warmed to 37°C (Life Technologies, Carlsbad, CA, USA) and incubated at room  
547 temperature for 5 minutes. Next, 2 mL of 100% ethanol was added to each sample and RNA  
548 extraction was performed using the Qiagen RNeasy Mini Kit (Qiagen, Hilden, Germany)  
549 according to the manufacturer's instructions. The concentration and quality of RNA samples was  
550 determined using a Nanodrop One/One<sup>C</sup> UV Spectrophotometer (Thermo Fisher Scientific,  
551 Waltham, MA, USA) before storage at -80°C. Samples were submitted to the Microbial Genome  
552 Sequencing Center (Pittsburg, PA) for DNase treatment, rRNA depletion, library preparation,  
553 and Illumina paired-end sequencing. On average 98% of reads were mapped to the *M.*  
554 *acetivorans* C2A genome. Raw transcript reads were deposited to the Sequence Read Archive  
555 (SRA) and the BioProject accession number will be made available upon publication.

556 **RNAseq analysis.** Reads in FASTQ format were uploaded to KBase in a new 'Narrative': a  
557 Jupyter-based user interface in which the raw reads are processed using 'apps' and the  
558 output/result of each app is recorded and accessible for download (59). Raw transcript reads  
559 were grouped by strain in a 'SampleSet' using the app 'Create RNA-seq SampleSet'. Next, the

560 SampleSet was selected as input for read alignment using the HISAT2 (v.2.1.0) app with the  
561 *Methanosarcina acetivorans* C2A genome serving as the reference for mapping. Aligned reads  
562 were assembled using the Cufflinks (v2.2.1) app with the *M. acetivorans* C2A genome input as  
563 the reference. The output of Cufflinks was exported an Expression Set and individual expression  
564 matrices for each strain and associated replicates. The expression values for each gene were  
565 reported as  $\log_2(\text{FPKM})$  (fragments per kilobase per million mapped reads). Finally, differential  
566 expression matrices for each pairwise combination of strains were generated by uploading the  
567  $\log_2(\text{FPKM})$  Expression Set to the DESeq2 (v1.20.0) app. Changes in transcript abundance were  
568 considered significant between strains if a  $\geq \pm 2$   $\log_2$ -fold (q-values  $\leq 0.05$ ) change was seen.  
569 Differential expression of genes was visualized in volcano plots constructed using a Python  
570 script and a table with the locus tag,  $\log_2$ -fold change in expression, q-value, and assigned color  
571 for each gene. Before plotting, select genes were highlighted in colors other than gray by manual  
572 curation of the table in Microsoft Excel (version 16.62), and genes with a q-value of zero were  
573 assigned a value of 1E-300. Volcano plots show  $\log_2$ -fold change on the x-axis and  $\log_{10}(\text{q-}$   
574 value) on the y-axis for each gene.

### 575 **Funding Information**

576 The authors acknowledge funding from the Beckman Young Investigator Award sponsored by  
577 the Arnold and Mabel Beckman Foundation (to D.D.N and B.E.D), ‘New Tools for Advancing  
578 Model Systems in Aquatic Symbiosis’ program from the Gordon and Betty Moore Foundation  
579 (GBMF#9324) (to D.D.N and D.G), the Simons Early Career Investigator in Marine Microbial  
580 Ecology and Evolution Award (to D.D.N), the Searle Scholars Program sponsored by the  
581 Kinship Foundation (to D.D.N), the Rose Hills Innovator Grant (to D.D.N), the Packard  
582 Fellowship in Science and Engineering sponsored by the David and Lucille Packard Foundation

583 (to D.D.N), funding from the Shurl and Kay Curci Foundation (to D.D.N), the NIH ‘Genetic  
584 Dissection of Cells and Organisms’ training program (award #5T32GM132022-03) (to B.E.D.),  
585 and startup funds from the Department of Molecular and Cell Biology at UC Berkeley (to  
586 D.D.N). D.D.N is a Chan Zuckerberg Biohub Investigator. The funders had no role in the  
587 conceptualization and writing of this manuscript or the decision to submit the work for  
588 publication.

### 589 **Acknowledgements**

590 The authors would like to acknowledge Katie Shalvarjian for assistance with data visualization  
591 and other members of the Nayak lab for their feedback and input.

### 592 **Competing Interests**

593 The authors do not declare any competing interests.

594 **Figure Legends**

595 **Figure 1. a)** Schematic of the electron transport chain in *Methanosarcina acetivorans* depicting  
596 energy conservation facilitated by two respiratory complexes: 1) the F<sub>420</sub> dehydrogenase  
597 complex in (Fpo) in blue and the *Rhodobacter* nitrogen fixation complex (Rnf) in red along with  
598 the terminal electron accepting complex HdrDE in green. **b)** Model of the six-subunit Rnf  
599 complex from the bacterium, *Acetobacterium woodii*, which serves as a reversible Na<sup>+</sup>-pumping  
600 Ferredoxin (Fd):NAD<sup>+</sup> oxidoreductase (20). Note: the Rnf complex found in members of the  
601 *Methanosarcinales* couples the transfer of electrons between the cytosolic Fd pool and the  
602 membrane-bound MP pool to sodium translocation. The exact pathway of electron flow from Fd  
603 to MP is unknown. Additionally, in the *Methanosarcinales*, Rnf contains eight subunits instead  
604 of six, one of which is a multiheme c-type cytochrome, MmcA.

605

606 **Figure 2. a)** Chromosomal organization of the eight-gene *rnf* operon in *M. acetivorans*,  
607 reflecting the genotype of the parent strain (WWM60) used in this study. Locus tags are provided  
608 under each gene. **b)** Chromosomal organization the *rnf* locus in the  $\Delta rnf$  mutant showing a clean  
609 deletion of the operon. A 30 basepair (bp) region of the 5' end of *mmcA* and a 30 bp region of at  
610 the 3' end of *rnfX* are maintained on the chromosome to preclude interference with up- and  
611 down-stream regulatory elements outside of the operon. **c)** Chromosomal organization of the *rnf*  
612 locus in the  $\Delta mmcA$  mutant. Here, 30 bp regions at the 5' and 3' ends of *mmcA* are maintained to  
613 prevent frameshift disruption of downstream *rnf* genes. **d)** Expression values for the *rnf* genes in  
614 the parent and  $\Delta mmcA$  strains. Expression is measured in log<sub>2</sub>(FPKM) [fragments per kilobase of  
615 transcript per million mapped reads] for each gene. In the  $\Delta mmcA$  strain, only *mmcA* expression  
616 is abolished [p-value = 3.5E-9; Welch's t-test] indicating the deletion does not adversely impact

617 on the expression of other genes in the operon. Significance (p-values < 0.05) for log<sub>2</sub>(FPKM)  
618 values of individual genes between strains is indicated with an asterisk or “ns” for non-  
619 significant change. e) Growth curve of the parent strain carrying an empty vector control (light  
620 gray circles), the  $\Delta mmcA$  mutant carrying an empty vector control (dark gray diamonds), and the  
621  $\Delta mmcA$  mutant carrying a plasmid expressing *mmcA* (pink inverted triangles) in HS medium  
622 containing 50 mM TMA as the sole carbon and energy source. The empty vector contains the  $\beta$ -  
623 glucuronidase gene, *uidA*, under the control of a tetracycline inducible *PmcrB* (*tetO4*) promoter  
624 described previously in (60). The complementation vector contains *mmcA* under the control of a  
625 tetracycline inducible *PmcrB* (*tetO4*) promoter described previously in (24). Three replicate  
626 tubes of each strain were used for growth assays and tetracycline was added to a final  
627 concentration of 100 ug/mL in the growth medium.

628

629 **Figure 3.** Growth curves of the parent strain (WWM60) (blue circles),  $\Delta rnf$  (green diamonds),  
630 and  $\Delta mmcA$  (orange inverted triangles) mutants on **a)** 40 mM acetate, **b)** 50 mM trimethylamine  
631 (TMA), **c)** 125 mM MeOH, and **d)** 20 mM dimethylsulfide (DMS) as the sole carbon and energy  
632 source. Three replicate tubes of each strain were used for growth assays.

633

634 **Figure 4. a)** Growth curve of the parent strain (WWM60) (blue circles),  $\Delta rnf$  (green diamonds),  
635 and  $\Delta mmcA$  (orange inverted triangles) mutants in HS medium containing 20 mM  
636 dimethylsulfide (DMS) as the sole carbon and energy source after transfer from HS medium with  
637 50 mM trimethylamine (TMA) as the sole carbon and energy source. **b)** A schematic depicting  
638 the genotype of a strain generated to assay the role of *mmcA* in the absence of the rest of the *rnf*  
639 genes. On the chromosome, the entire *rnf* locus has been deleted. The strain carries an

640 autonomously replicating plasmid encoding *mmcA* with a tandem-affinity-purification (TAP) tag  
641 at the C-terminus under the control of a *PmcrB* promoter described previously in (60). **c)** Growth  
642 curve of the  $\Delta rnf$  strain carrying an empty vector control (dark gray circles) or a plasmid  
643 expressing *mmcA* (light blue diamonds) in HS medium containing 50 mM TMA as the sole  
644 carbon and energy source. The empty vector contains the  $\beta$ -glucuronidase gene, *uidA*, under the  
645 control of a *PmcrB* promoter described previously in (60). Three replicate tubes of each strain  
646 were used for growth assays.

647

648 **Figure 5. a)** Volcano plot showing the differential expression of genes between the  $\Delta mmcA$  and  
649  $\Delta rnf$  mutants. Genes with higher expression in the  $\Delta mmcA$  mutant have a positive  $\log_2$ -fold  
650 change value, while genes with higher expression in the  $\Delta rnf$  mutant have a negative  $\log_2$ -fold  
651 change value. Dashed lines on the plot delineate the cutoff for ‘significant’  $\log_2$ -fold change in  
652 transcript abundance in either mutant. In the  $\Delta rnf$  mutant, two sets of genes are significantly  
653 more highly expressed: six subunits of the Fpo complex (shaded in blue), and multiple  
654 methylamine methyltransferases and permeases (shaded in green). Genes in orange have higher  
655 transcript levels in the  $\Delta mmcA$  mutant relative to both the  $\Delta rnf$  mutant and the parent strain  
656 (WWM60), genes in gold have significantly lower transcript levels in the  $\Delta rnf$  mutant relative to  
657 both the  $\Delta mmcA$  mutant and WWM60, whereas genes in red are uniquely upregulated in the  
658  $\Delta mmcA$  mutant compared to the  $\Delta rnf$  mutant. The seven remaining genes of the Rnf complex in  
659 the  $\Delta mmcA$  mutant are shaded in maroon. **b)** Chromosomal organization of the thirteen-gene *fpo*  
660 operon in *M. acetivorans*, and the additional *fpoO2* and *fpoF* genes. Double vertical lines  
661 indicate genes are located more than 3 kbp away in the genome. The  $\log_2$ -fold change in  
662 transcript abundance for each gene in the Fpo complex for all pairwise comparisons between the

663  $\Delta mmcA$  mutant, the  $\Delta rnf$  mutant, and WWM60 are shown in the bar graph. The dashed line on  
664 the plot delineates the cutoff for ‘significant’  $\log_2$ -fold change in transcript abundance. In the bar  
665 graph: light blue bars represent the expression in the  $\Delta mmcA$  mutant compared to the  $\Delta rnf$   
666 mutant, with higher expression in the  $\Delta mmcA$  mutant denoted by a positive  $\log_2$ -fold change.  
667 Medium blue bars represent the expression in the  $\Delta rnf$  mutant compared to the parent strain, with  
668 higher expression in the  $\Delta rnf$  mutant denoted by a positive  $\log_2$ -fold change. Dark blue bars  
669 represent the expression in the  $\Delta mmcA$  mutant compared to the parent strain, with higher  
670 expression in the  $\Delta mmcA$  strain denoted by a positive  $\log_2$ -fold change. c) Chromosomal  
671 organization of four different methylamine methyltransferase loci. The  $\log_2$ -fold change in  
672 transcript abundance for each gene at the various loci for all pairwise comparisons between the  
673  $\Delta mmcA$  mutant, the  $\Delta rnf$  mutant, and WWM60 are shown in the bar graphs. The dashed lines on  
674 the plots delineate the cutoff for ‘significant’  $\log_2$ -fold change in transcript abundance. In both  
675 bar graphs: light green bars represent the expression in the  $\Delta mmcA$  mutant compared to the  $\Delta rnf$   
676 mutant, with higher expression in the  $\Delta mmcA$  mutant denoted by a positive  $\log_2$ -fold change.  
677 Medium green bars represent the expression in the  $\Delta rnf$  mutant compared to the parent strain,  
678 with higher expression in the  $\Delta rnf$  mutant denoted by a positive  $\log_2$ -fold change. Dark green  
679 bars represent the expression in the  $\Delta mmcA$  mutant compared to the parent strain, with higher  
680 expression in the  $\Delta mmcA$  strain denoted by a positive  $\log_2$ -fold change.

681

682 **Figure 6. a)** Volcano plot showing the differential expression of genes between the  $\Delta rnf$  and the  
683 parent strain (WWM60). Genes with higher expression in the  $\Delta rnf$  mutant have a positive  $\log_2$ -  
684 fold change value, while genes with higher expression in the parent have a negative  $\log_2$ -fold  
685 change value. Dashed lines on the plot delineate the cutoff for ‘significant’  $\log_2$ -fold change in

686 transcript abundance in either strain. Genes in light purple are significantly differentially  
687 expressed in both the  $\Delta rnf$  and  $\Delta mmcA$  mutant relative to the WWM60. Genes in dark magenta  
688 have significant differential expression only in the  $\Delta rnf$  mutant relative to WWM60. **b)** Volcano  
689 plot  
690 showing the differential expression of genes between the  $\Delta mmcA$  and the parent strain  
691 (WWM60). Genes with higher expression in the  $\Delta mmcA$  mutant have a positive  $\log_2$ -fold change  
692 value, while genes with higher expression in the parent have a negative  $\log_2$ -fold change value.  
693 Dashed lines on the plot delineate the cutoff for ‘significant’  $\log_2$ -fold change in transcript  
694 abundance in either strain. Genes in light purple are significantly differentially expressed in both  
695 the  $\Delta rnf$  and  $\Delta mmcA$  mutant relative to the parent strain. Genes in dark purple have significant  
696 differential expression only in the  $\Delta mmcA$  mutant relative to the parent. **c)** Schematic of the  $\text{Na}^+$ -  
697 translocating F1F0 ATP synthase in *M. acetivorans*. ATP hydrolysis results in the translocation  
698 of three sodium ions across the cell membrane to maintain the sodium gradient in the absence of  
699 a fully functional Rnf complex (44). Subunits with significant fold change are shaded in orange.  
700 The  $\log_2$ -fold change in transcript abundance for every gene in the F1F0 ATP synthase between  
701 the  $\Delta rnf$  mutant (black bars) and the  $\Delta mmcA$  mutant (gray bars) compared to WWM60 are  
702 shown in the bar graph. The dashed line on the plot delineates the cutoff for a ‘significant’  $\log_2$ -  
703 fold change in transcript abundance. **d)** Chromosomal organization of the *cdh1* operon in *M.*  
704 *acetivorans*. The  $\log_2$ -fold change in transcript abundance for each gene in the *cdh1* operon  
705 between the  $\Delta rnf$  mutant (black bars) and the  $\Delta mmcA$  mutant (gray bars) compared to WWM60  
706 are shown in the bar graph. The dashed line on the plot delineates the cutoff for a ‘significant’  
707  $\log_2$ -fold change in transcript abundance.  
708



709 **References**

- 710 1. Dean JF, Middelburg JJ, Röckmann T, Aerts R, Blauw LG, Egger M, Jetten MSM, de Jong  
711 AEE, Meisel OH, Rasigraf O, Slomp CP, in't Zandt MH, Dolman AJ. 2018. Methane  
712 feedbacks to the global climate system in a warmer world. *Rev Geophys* 56:207–250.
- 713 2. Thauer RK, Kaster A-K, Seedorf H, Buckel W, Hedderich R. 2008. Methanogenic archaea:  
714 ecologically relevant differences in energy conservation. *Nat Rev Microbiol* 6:579–591.
- 715 3. Thauer RK 1998. Biochemistry of methanogenesis: a tribute to Marjory Stephenson: 1998  
716 Marjory Stephenson Prize Lecture. *Microbiology* 144:2377–2406.
- 717 4. Mand TD, Metcalf WW. 2019. Energy conservation and hydrogenase function in  
718 methanogenic archaea, in particular the genus *Methanosarcina*. *Microbiol Mol Biol Rev*  
719 83:e00020-19.
- 720 5. Abken H-J, Tietze M, Brodersen J, Bäumer S, Beifuss U, Deppenmeier U. 1998. Isolation  
721 and characterization of methanophenazine and function of phenazines in membrane-bound  
722 electron transport of *Methanosarcina mazei* Gö1. *J Bacteriol* 180:2027–2032.
- 723 6. DiMarco AA, Bobik TA, Wolfe RS. Unusual coenzymes of methanogenesis. 1990. *Annu*  
724 *Rev Biochem* 59:355-394.
- 725 7. Künkel A, Vaupel M, Heim S, Thauer RK, Hedderich R. 1997. Heterodisulfide reductase  
726 from methanol-grown cells of *Methanosarcina barkeri* is not a flavoenzyme. *Eur J Biochem*  
727 244:226–234.

- 728 8. Buan NR, Metcalf WW. 2010. Methanogenesis by *Methanosarcina acetivorans* involves two  
729 structurally and functionally distinct classes of heterodisulfide reductase. *Mol Microbiol*  
730 75:843–853.
- 731 9. Simianu M, Murakami E, Brewer JM, Ragsdale SW. 1998. Purification and properties of the  
732 heme- and iron–sulfur-containing heterodisulfide reductase from *Methanosarcina*  
733 *thermophila*. *Biochemistry* 37:10027–10039.
- 734 10. Kulkarni G, Kridelbaugh DM, Guss AM, Metcalf WW. 2009. Hydrogen is a preferred  
735 intermediate in the energy-conserving electron transport chain of *Methanosarcina barkeri*.  
736 *Proc Natl Acad Sci USA* 106:15915–15920.
- 737 11. Kulkarni G, Mand TD, Metcalf WW. 2018. Energy conservation via hydrogen cycling in the  
738 methanogenic archaeon *Methanosarcina barkeri*. *mBio* 9:e01256-18.
- 739 12. Mand TD, Kulkarni G, Metcalf WW. 2018. Genetic, biochemical, and molecular  
740 characterization of *Methanosarcina barkeri* mutants lacking three distinct classes of  
741 hydrogenase. *J Bacteriol* 200:e00342-18.
- 742 13. Guss AM, Kulkarni G, Metcalf WW. 2009. Differences in hydrogenase gene expression  
743 between *Methanosarcina acetivorans* and *Methanosarcina barkeri*. *J Bacteriol* 191:2826–  
744 2833.
- 745 14. Galagan JE, Nusbaum C, Roy A, Endrizzi MG, Macdonald P, FitzHugh W, Calvo S, Engels  
746 R, Smirnov S, Atnoor D, Brown A, Allen N, Naylor J, Stange-Thomann N, DeArellano K,  
747 Johnson R, Linton L, McEwan P, McKernan K, Talamas J, Tirrell A, Ye W, Zimmer A,  
748 Barber RD, Cann I, Graham DE, Grahame DA, Guss AM, Hedderich R, Ingram-Smith C,

- 749 Kuettner HC, Krzycki JA, Leigh JA, Li W, Liu J, Mukhopadhyay B, Reeve JN, Smith K,  
750 Springer TA, Umayam LA, White O, White RH, Macario EC de, Ferry JG, Jarrell KF, Jing  
751 H, Macario AJL, Paulsen I, Pritchett M, Sowers KR, Swanson RV, Zinder SH, Lander E,  
752 Metcalf WW, Birren B. 2002. The genome of *M. acetivorans* reveals extensive metabolic  
753 and physiological diversity. *Genome Res* 12:532–542.
- 754 15. Schlegel K, Welte C, Deppenmeier U, Müller V. 2012. Electron transport during acetoclastic  
755 methanogenesis by *Methanosarcina acetivorans* involves a sodium-translocating Rnf  
756 complex. *FEBS J* 279:4444–4452.
- 757 16. Bäumer S, Ide T, Jacobi C, Johann A, Gottschalk G, Deppenmeier U. 2000. The F420H2  
758 dehydrogenase from *Methanosarcina mazei* is a redox-driven proton pump closely related to  
759 NADH dehydrogenases. *J Biol Chem* 275:17968–17973.
- 760 17. Friedrich T, Steinmüller K, Weiss H. 1995. The proton-pumping respiratory complex I of  
761 bacteria and mitochondria and its homologue in chloroplasts. *FEBS Lett* 367:107–111.
- 762 18. Li Q, Li L, Rejtar T, Lessner DJ, Karger BL, Ferry JG. 2006. Electron transport in the  
763 pathway of acetate conversion to methane in the marine archaeon *Methanosarcina*  
764 *acetivorans*. *J Bacteriol* 188:702–710.
- 765 19. Wang M, Tomb J-F, Ferry JG. 2011. Electron transport in acetate-grown *Methanosarcina*  
766 *acetivorans*. *BMC Microbiol* 11:165.
- 767 20. Biegel E, Schmidt S, González JM, Müller V. 2011. Biochemistry, evolution and  
768 physiological function of the Rnf complex, a novel ion-motive electron transport complex in  
769 prokaryotes. *Cell Mol Life Sci* 68:613–634.

- 770 21. Hreha TN, Mezić KG, Herce HD, Duffy EB, Bourges A, Pryshchep S, Juarez O, Barquera B.  
771 2015. Complete topology of the RNF Complex from *Vibrio cholerae*. *Biochemistry*  
772 54:2443–2455.
- 773 22. Holmes DE, Ueki T, Tang H-Y, Zhou J, Smith JA, Chaput G, Lovley DR. 2019. A  
774 membrane-bound cytochrome enables *Methanosarcina acetivorans* to conserve energy from  
775 extracellular electron transfer. *mBio* 10:e00789-19.
- 776 23. Mand TD. 2018. Hydrogenase utilization and regulation in species of *Methanosarcina*.  
777 University of Illinois at Urbana-Champaign, Urbana-Champaign, IL.
- 778 24. Gupta D, Shalvarjian KE, Nayak DD. 2022. An archaea-specific *c*-type cytochrome  
779 maturation machinery is crucial for methanogenesis in *Methanosarcina acetivorans*. *eLife*  
780 11:e76970.
- 781 25. Nayak DD, Metcalf WW. 2017. Cas9-mediated genome editing in the methanogenic  
782 archaeon *Methanosarcina acetivorans*. *Proc Natl Acad Sci USA* 114:2976–2981.
- 783 26. Terlesky KC, Ferry JG. 1988. Ferredoxin requirement for electron transport from the carbon  
784 monoxide dehydrogenase complex to a membrane-bound hydrogenase in acetate-grown  
785 *Methanosarcina thermophila*. *J Biol Chem* 263:4075–4079.
- 786 27. Li Q, Li L, Rejtar T, Karger BL, Ferry JG. 2005. Proteome of *Methanosarcina acetivorans*  
787 Part II: comparison of protein levels in acetate- and methanol-grown cells. *J Proteome Res*  
788 4:129–135.

- 789 28. Hippe H, Caspari D, Fiebig K, Gottschalk G. 1979. Utilization of trimethylamine and other  
790 N-methyl compounds for growth and methane formation by *Methanosarcina barkeri*. Proc  
791 Natl Acad Sci USA 76:494–498.
- 792 29. Pritchett MA, Metcalf WW. 2005. Genetic, physiological and biochemical characterization  
793 of multiple methanol methyltransferase isozymes in *Methanosarcina acetivorans* C2A. Mol  
794 Microbiol 56:1183–1194.
- 795 30. Oelgeschläger E, Rother M. 2009. *In vivo* role of three fused corrinoid/methyl transfer  
796 proteins in *Methanosarcina acetivorans*. Mol Microbiol 72:1260–1272.
- 797 31. Deppenmeier U. 2004. The membrane-bound electron transport system of *Methanosarcina*  
798 species. J Bioenerg Biomembr 36:55–64.
- 799 32. Welte C, Deppenmeier U. 2011. Membrane-bound electron transport in *Methanosaeta*  
800 *thermophila*. J Bacteriol 193:2868–2870.
- 801 33. Burke SA, Lo SL, Krzycki JA. 1998. Clustered genes encoding the methyltransferases of  
802 methanogenesis from monomethylamine. J Bacteriol 180:3432–3440.
- 803 34. Paul L, Ferguson DJ, Krzycki JA. 2000. The trimethylamine methyltransferase gene and  
804 multiple dimethylamine methyltransferase genes of *Methanosarcina barkeri* contain in-  
805 frame and read-through amber codons. J Bacteriol 182:2520–2529.
- 806 35. Scofield MA, Lewis WS, Schuster SM. 1990. Nucleotide sequence of *Escherichia coli asnB*  
807 and deduced amino acid sequence of asparagine synthetase B. J Biol Chem 265:12895–  
808 12902.

- 809 36. Jarrell KF, Jones GM, Nair DB. 2010. Biosynthesis and role of N-Linked glycosylation in  
810 cell surface structures of archaea with a focus on flagella and S layers. *Int J Microbiol*  
811 2010:e470138.
- 812 37. Vander Horn PB, Backstrom AD, Stewart V, Begley TP. 1993. Structural genes for thiamine  
813 biosynthetic enzymes (*thiCEFGH*) in *Escherichia coli* K-12. *J Bacteriol* 175:982–992.
- 814 38. Holmes DE, Rotaru A-E, Ueki T, Shrestha PM, Ferry JG, Lovley DR. 2018. Electron and  
815 proton flux for carbon dioxide reduction in *Methanosarcina barkeri* during direct  
816 interspecies electron transfer. *Front Microbiol* 9:3109.
- 817 39. De Pina K, Desjardin V, Mandrand-Berthelot M-A, Giordano G, Wu L-F. 1999. Isolation  
818 and characterization of the *nikR* gene encoding a nickel-responsive regulator in *Escherichia*  
819 *coli*. *J Bacteriol* 181:670–674.
- 820 40. Zhou Y, Wang L, Yang F, Lin X, Zhang S, Zhao ZK. 2011. Determining the extremes of the  
821 cellular NAD(H) Level by using an *Escherichia coli* NAD<sup>+</sup>-auxotrophic mutant. *Appl*  
822 *Environ Microbiol* 77:6133–6140.
- 823 41. Paula FS, Chin JP, Schnürer A, Müller B, Manesiotis P, Waters N, Macintosh KA, Quinn JP,  
824 Connolly J, Abram F, McGrath JW, O’Flaherty V. 2019. The potential for polyphosphate  
825 metabolism in archaea and anaerobic polyphosphate formation in *Methanosarcina mazei*. *Sci*  
826 *Rep* 9:17101.
- 827 42. Rosenberg H, Gerdes RG, Chegwiddden K. 1977. Two systems for the uptake of phosphate in  
828 *Escherichia coli*. *J Bacteriol* 131(2):505-511

- 829 43. Schlegel K, Leone V, Faraldo-Gómez JD, Müller V. 2012. Promiscuous archaeal ATP  
830 synthase concurrently coupled to Na<sup>+</sup> and H<sup>+</sup> translocation. Proc Natl Acad Sci USA  
831 109:947–952.
- 832 44. Saum R, Schlegel K, Meyer B, Müller V. 2009. The F<sub>1</sub>F<sub>0</sub> ATP synthase genes in  
833 *Methanosarcina acetivorans* are dispensable for growth and ATP synthesis. FEMS  
834 Microbiol Lett 300:230–236.
- 835 45. Walker JE. 2013. The ATP synthase: the understood, the uncertain and the unknown.  
836 Biochem Soc Trans 41:1–16.
- 837 46. Jasso-Chavez R, Apolinario EE, Sowers KR, Ferry JG. 2013. MrpA functions in energy  
838 conversion during acetate-dependent growth of *Methanosarcina acetivorans*. J Bacteriol  
839 195:3987–3994.
- 840 47. Fu H, Metcalf WW. 2015. Genetic basis for metabolism of methylated sulfur compounds in  
841 *Methanosarcina* species. J Bacteriol 197:1515–1524.
- 842 48. Lacasse MJ, Zamble DB. 2016. [NiFe]-hydrogenase maturation. Biochemistry 55:1689–  
843 1701.
- 844 49. Brey RN, Rosen BP, Sorensen EN. 1980. Cation/proton antiport systems in *Escherichia coli*.  
845 Properties of the potassium/proton antiporter. J Biol Chem 255:39–44.
- 846 50. Matschiavelli N, Oelgeschläger E, Cocchiararo B, Finke J, Rother M. 2012. Function and  
847 regulation of isoforms of carbon monoxide dehydrogenase/acetyl coenzyme A synthase in  
848 *Methanosarcina acetivorans*. J Bacteriol 194:5377–5387.

- 849 51. Hovey R, Lenters S, Ehrenreich A, Salmon K, Saba K, Gottschalk G, Gunsalus RP,  
850 Deppenmeier U. 2005. DNA microarray analysis of *Methanosarcina mazei* Gö1 reveals  
851 adaptation to different methanogenic substrates. *Mol Genet Genomics* 273:225–239.
- 852 52. Reichlen MJ, Vepachedu VR, Murakami KS, Ferry JG. 2012. MreA functions in the global  
853 regulation of methanogenic pathways in *Methanosarcina acetivorans*. *mBio* 3:e00189-12.
- 854 53. Gaston MA, Jiang R, Krzycki JA. 2011. Functional context, biosynthesis, and genetic  
855 encoding of pyrrolysine. *Curr Opin Microbiol* 14:342–349.
- 856 54. Zheng K, Ngo PD, Owens VL, Yang X, Mansoorabadi SO. 2016. The biosynthetic pathway  
857 of coenzyme F430 in methanogenic and methanotrophic archaea. *Science* 354:339–342.
- 858 55. Moore SJ, Sowa ST, Schuchardt C, Deery E, Lawrence AD, Ramos JV, Billig S, Birkemeyer  
859 C, Chivers PT, Howard MJ, Rigby SEJ, Layer G, Warren MJ. 2017. Elucidation of the  
860 biosynthesis of the methane catalyst coenzyme F430. *Nature* 543:78–82.
- 861 56. Sowers KR, Boone JE, Gunsalus RP. 1993. Disaggregation of *Methanosarcina* spp. and  
862 growth as single cells at elevated osmolarity. *Appl Environ Microbiol* 59:3832–3839.
- 863 57. Metcalf WW, Zhang JK, Wolfe RS. 1998. An anaerobic, intrachamber incubator for growth  
864 of *Methanosarcina* spp. on methanol-containing solid media. *Appl Environ Microbiol*  
865 64:768–770.
- 866 58. Metcalf WW, Zhang JK, Apolinario E, Sowers KR, Wolfe RS. 1997. A genetic system for  
867 archaea of the genus *Methanosarcina*: liposome-mediated transformation and construction of  
868 shuttle vectors. *Proc Natl Acad Sci USA* 94:2626–2631.



- 869 59. Arkin AP, Cottingham RW, Henry CS, Harris NL, Stevens RL, Maslov S, Dehal P, Ware D,  
870 Perez F, Canon S, Sneddon MW, Henderson ML, Riehl WJ, Murphy-Olson D, Chan SY,  
871 Kamimura RT, Kumari S, Drake MM, Brettin TS, Glass EM, Chivian D, Gunter D, Weston  
872 DJ, Allen BH, Baumohl J, Best AA, Bowen B, Brenner SE, Bun CC, Chandonia J-M, Chia  
873 J-M, Colasanti R, Conrad N, Davis JJ, Davison BH, DeJongh M, Devoid S, Dietrich E,  
874 Dubchak I, Edirisinghe JN, Fang G, Faria JP, Frybarger PM, Gerlach W, Gerstein M,  
875 Greiner A, Gurtowski J, Haun HL, He F, Jain R, Joachimiak MP, Keegan KP, Kondo S,  
876 Kumar V, Land ML, Meyer F, Mills M, Novichkov PS, Oh T, Olsen GJ, Olson R, Parrello  
877 B, Pasternak S, Pearson E, Poon SS, Price GA, Ramakrishnan S, Ranjan P, Ronald PC,  
878 Schatz MC, Seaver SMD, Shukla M, Sutormin RA, Syed MH, Thomason J, Tintle NL,  
879 Wang D, Xia F, Yoo H, Yoo S, Yu D. 2018. KBase: The United States Department of  
880 Energy systems biology knowledgebase. *Nat Biotechnol* 36:566–569.
- 881 60. Guss AM, Rother M, Zhang JK, Kulkarni G, Metcalf WW. 2008. New methods for tightly  
882 regulated gene expression and highly efficient chromosomal integration of cloned genes for  
883 *Methanosarcina* species. *Archaea* 2:193–203.
- 884

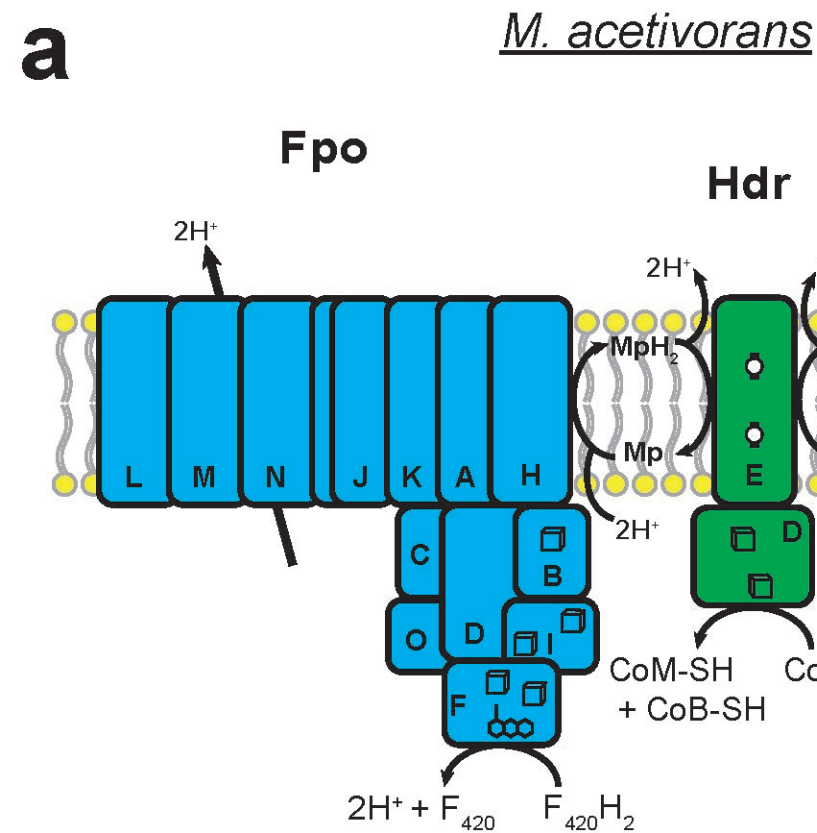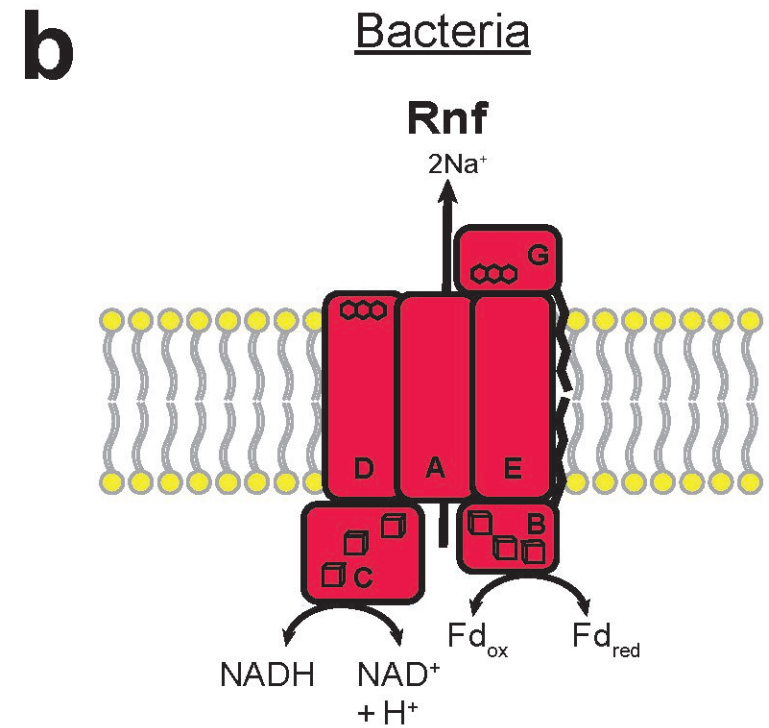

Cofactors:  $\square$  FeS cluster,  $\circ$  FAD,  $\circ$  FMN,  $\circ$  heme b,  $\circ$  heme c,  $\circ$  NiFe site

**Figure 1. a)** Schematic of the electron transport chain in *Methanosarcina acetivorans* depicting energy conservation facilitated by two respiratory complexes: 1) the  $F_{420}$  dehydrogenase complex in (Fpo) in blue and the *Rhodobacter* nitrogen fixation complex (Rnf) in red along with the terminal electron accepting complex HdrDE in green. **b)** Model of the six-subunit Rnf complex from the bacterium, *Acetobacterium woodii*, which serves as a reversible  $\text{Na}^+$ -pumping Ferredoxin (Fd): $\text{NAD}^+$  oxidoreductase (20). Note: the Rnf complex found in members of the *Methanosarcinales* couples the transfer of electrons between the cytosolic Fd pool and the membrane-bound MP pool to sodium translocation. The exact pathway of electron flow from Fd to MP is unknown. Additionally, in the *Methanosarcinales*, Rnf contains eight subunits instead of six, one of which is a multiheme c-type cytochrome, MmcA.



**a**

bioRxiv preprint doi: <https://doi.org/10.1101/2022.07.20.500911>; this version posted July 21, 2022. The copyright holder for this preprint (which was not certified by peer review) is the author/funder. All rights reserved. No reuse allowed without permission.

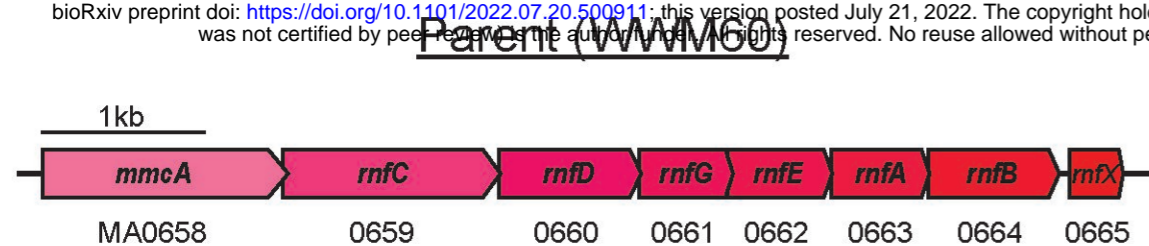**b**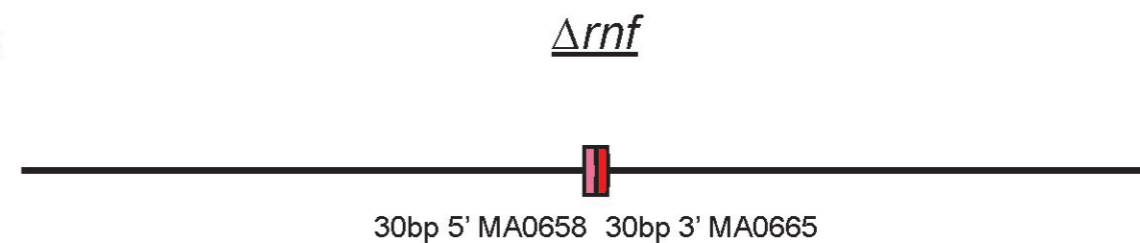**c**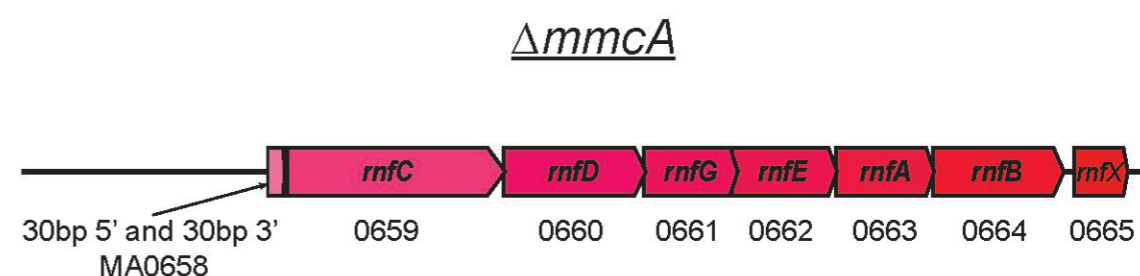**d**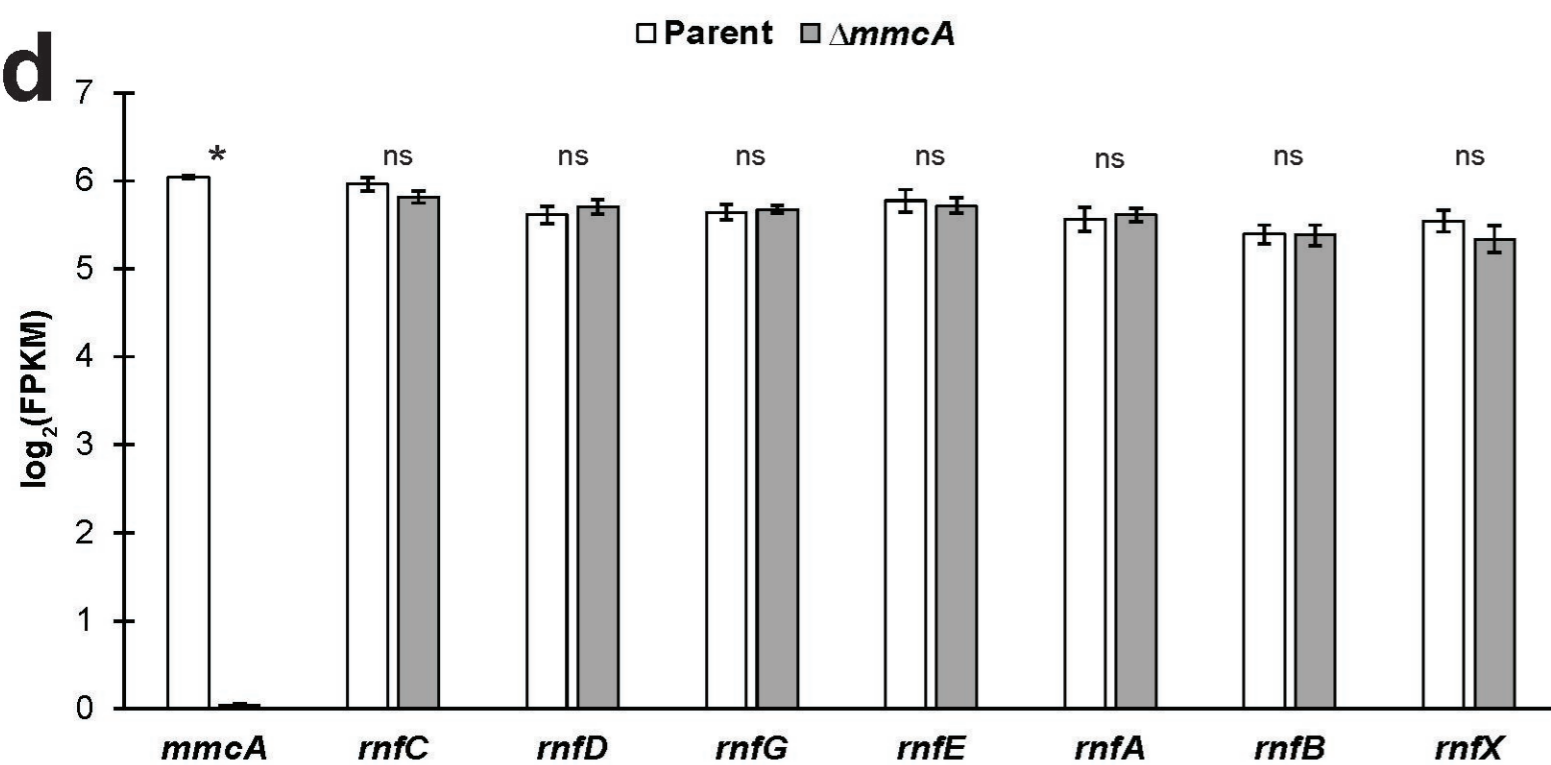**e**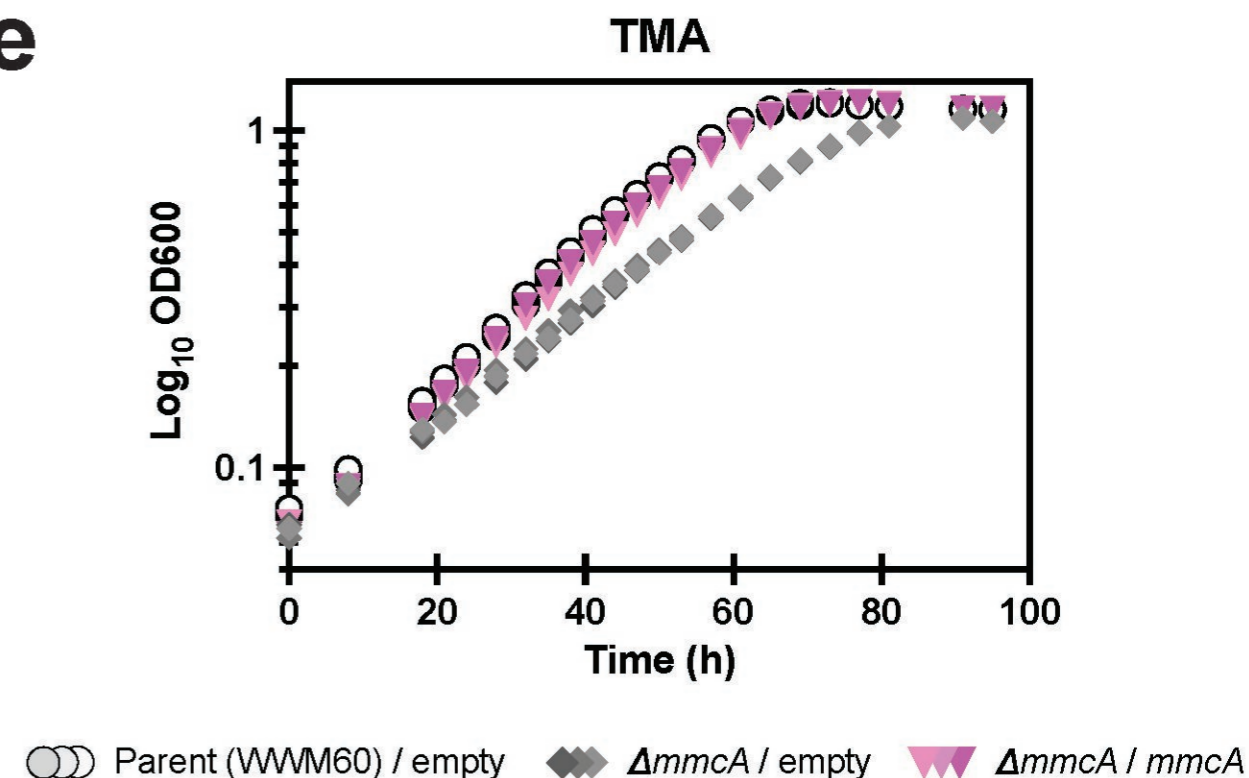

**Figure 2.** **a)** Chromosomal organization of the eight-gene *rnf* operon in *M. acetivorans*, reflecting the genotype of the parent strain (WWM60) used in this study. Locus tags are provided under each gene. **b)** Chromosomal organization the *rnf* locus in the  $\Delta rnf$  mutant showing a clean deletion of the operon. A 30 basepair (bp) region of the 5' end of *mmcA* and a 30 bp region of at the 3' end of *rnfX* are maintained on the chromosome to preclude interference with up- and down-stream regulatory elements outside of the operon. **c)** Chromosomal organization of the *rnf* locus in the in the  $\Delta mmcA$  mutant. Here, 30 bp regions at the 5' and 3' ends of *mmcA* are maintained to prevent frameshift disruption of downstream *rnf* genes. **d)** Expression values for the *rnf* genes in the parent and  $\Delta mmcA$  strains. Expression is measured in  $\log_2(\text{FPKM})$  [fragments per kilobase of transcript per million mapped reads] for each gene. In the  $\Delta mmcA$  strain, only *mmcA* expression is abolished [p-value = 3.5E-9; Welch's t-test] indicating the deletion does not adversely impact on the expression of other genes in the operon. Significance (p-values < 0.05) for  $\log_2(\text{FPKM})$  values of individual genes between strains is indicated with an asterisk or "ns" for non-significant change. **e)** Growth curve of the parent strain carrying an empty vector control (light gray circles), the  $\Delta mmcA$  mutant carrying an empty vector control (dark gray diamonds), and the  $\Delta mmcA$  mutant carrying a plasmid expressing *mmcA* (pink inverted triangles) in HS medium containing 50 mM TMA as the sole carbon and energy source. The empty vector contains the  $\beta$ -glucoronidase gene, *uidA*, under the control of a tetracycline inducible *PmcrB* (*tetO4*) promoter described previously in (60). The complementation vector contains *mmcA* under the control of a tetracycline indicible *PmcrB* (*tetO4*) promoter described previously in (24). Three replicate tubes of each strain were used for growth assays and tetracycline was added to a final concentration of 100  $\mu\text{g}/\text{mL}$  in the growth medium.

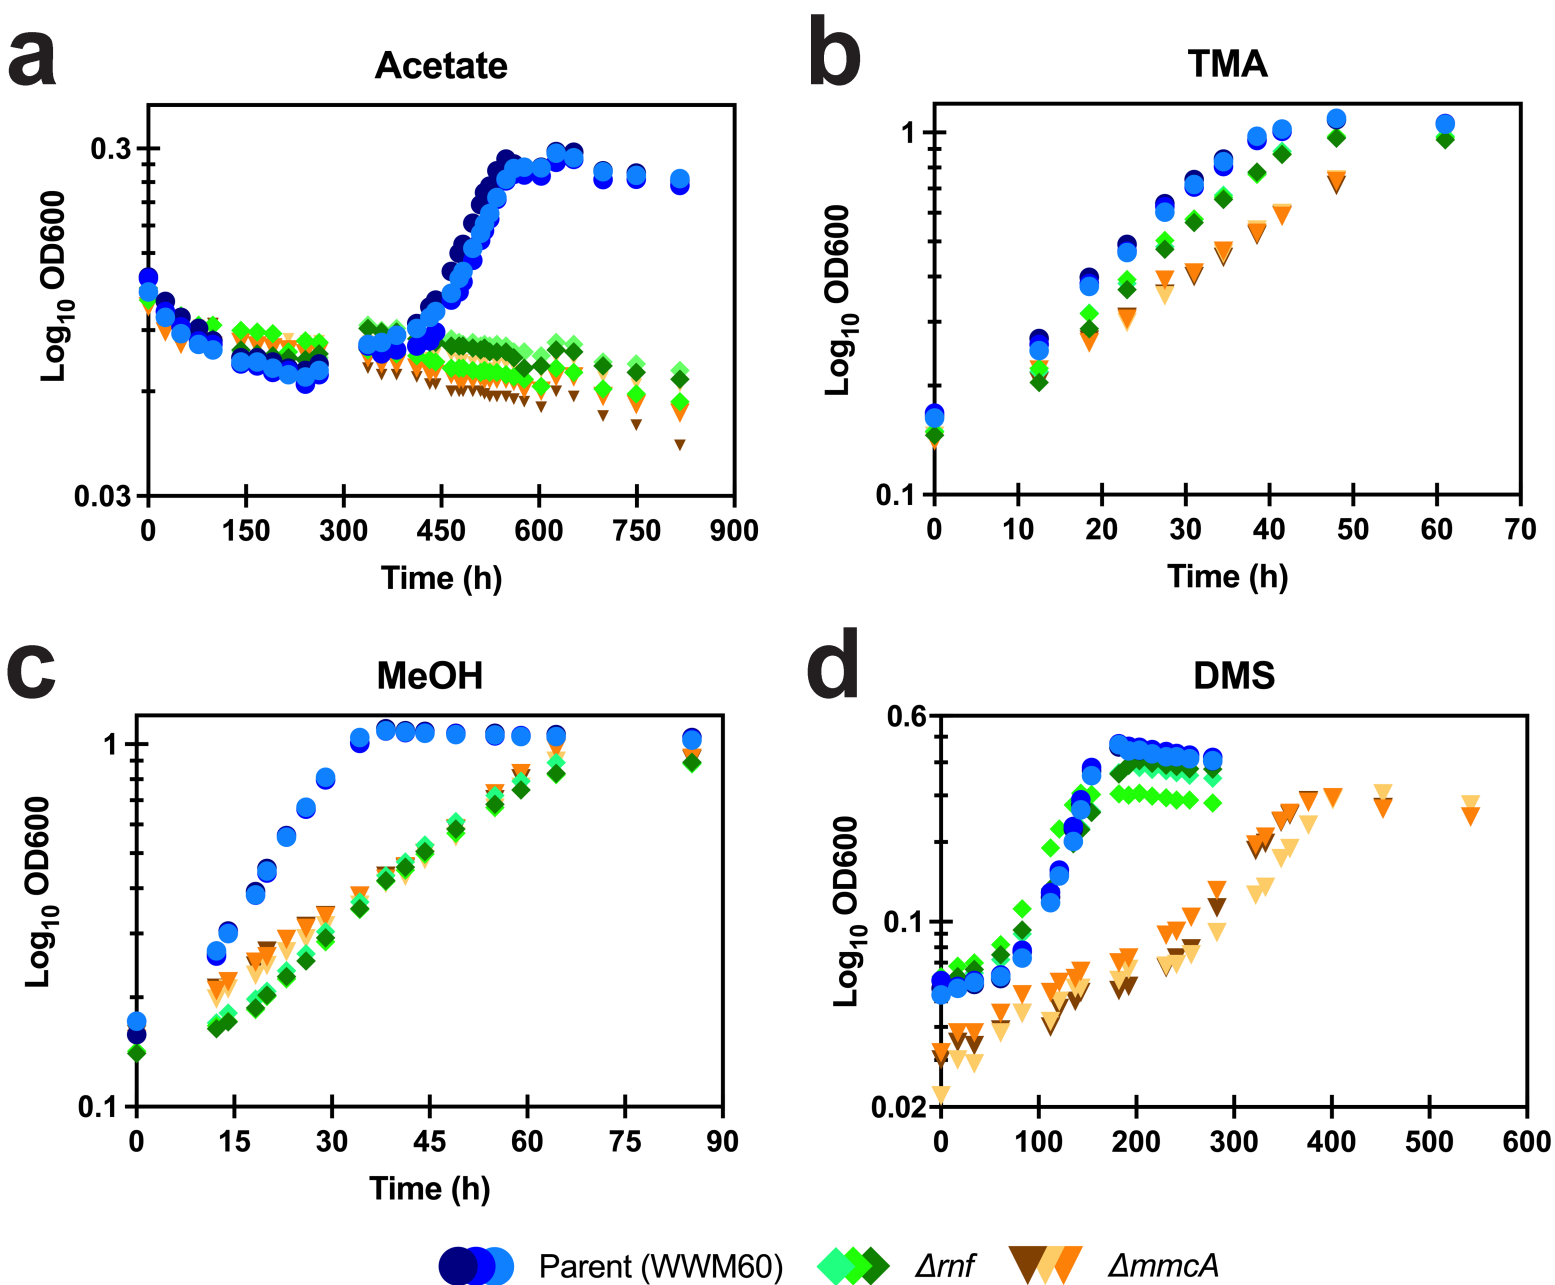

**Figure 3.** Growth curves of the parent strain (WWM60) (blue circles),  $\Delta rnf$  (green diamonds), and  $\Delta mmcA$  (orange inverted triangles) mutants on **a)** 40 mM acetate, **b)** 50 mM trimethylamine (TMA), **c)** 125 mM methanol (MeOH), and **d)** 20 mM dimethylsulfide (DMS) as the sole carbon and energy source. Three replicate tubes of each strain were used for growth assays.

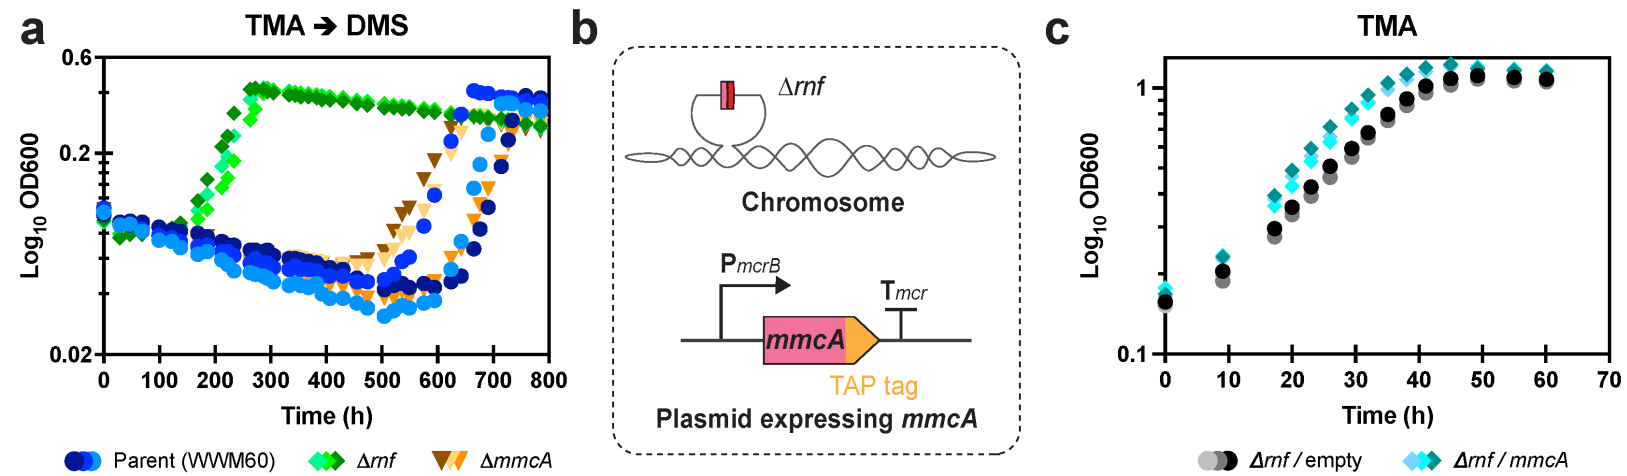

**Figure 4.** **a)** Growth curve of the parent strain (WWM60) (blue circles),  $\Delta rf$  (green diamonds), and  $\Delta mmcA$  (orange inverted triangles) mutants in HS medium containing 20 mM DMS as the sole carbon and energy source after transfer from HS medium with 50 mM TMA as the sole carbon and energy source. **b)** A schematic depicting the genotype of a strain generated to assay the role of *mmcA* in the absence of the rest of the *mf* genes. On the chromosome, the entire *mf* locus has been deleted. The strain carries an autonomously replicating plasmid encoding *mmcA* with a tandem-affinity-purification (TAP) tag at the C-terminus under the control of a *PmcrB* promoter described previously in (60). **c)** Growth curve of the  $\Delta rf$  strain carrying an empty vector control (dark gray circles) or a plasmid expressing *mmcA* (light blue diamonds) in HS medium containing 50 mM TMA as the sole carbon and energy source. The empty vector contains the  $\beta$ -glucuronidase gene, *uidA*, under the control of a *PmcrB* promoter described previously in (60). Three replicate tubes of each strain were used for growth assays.



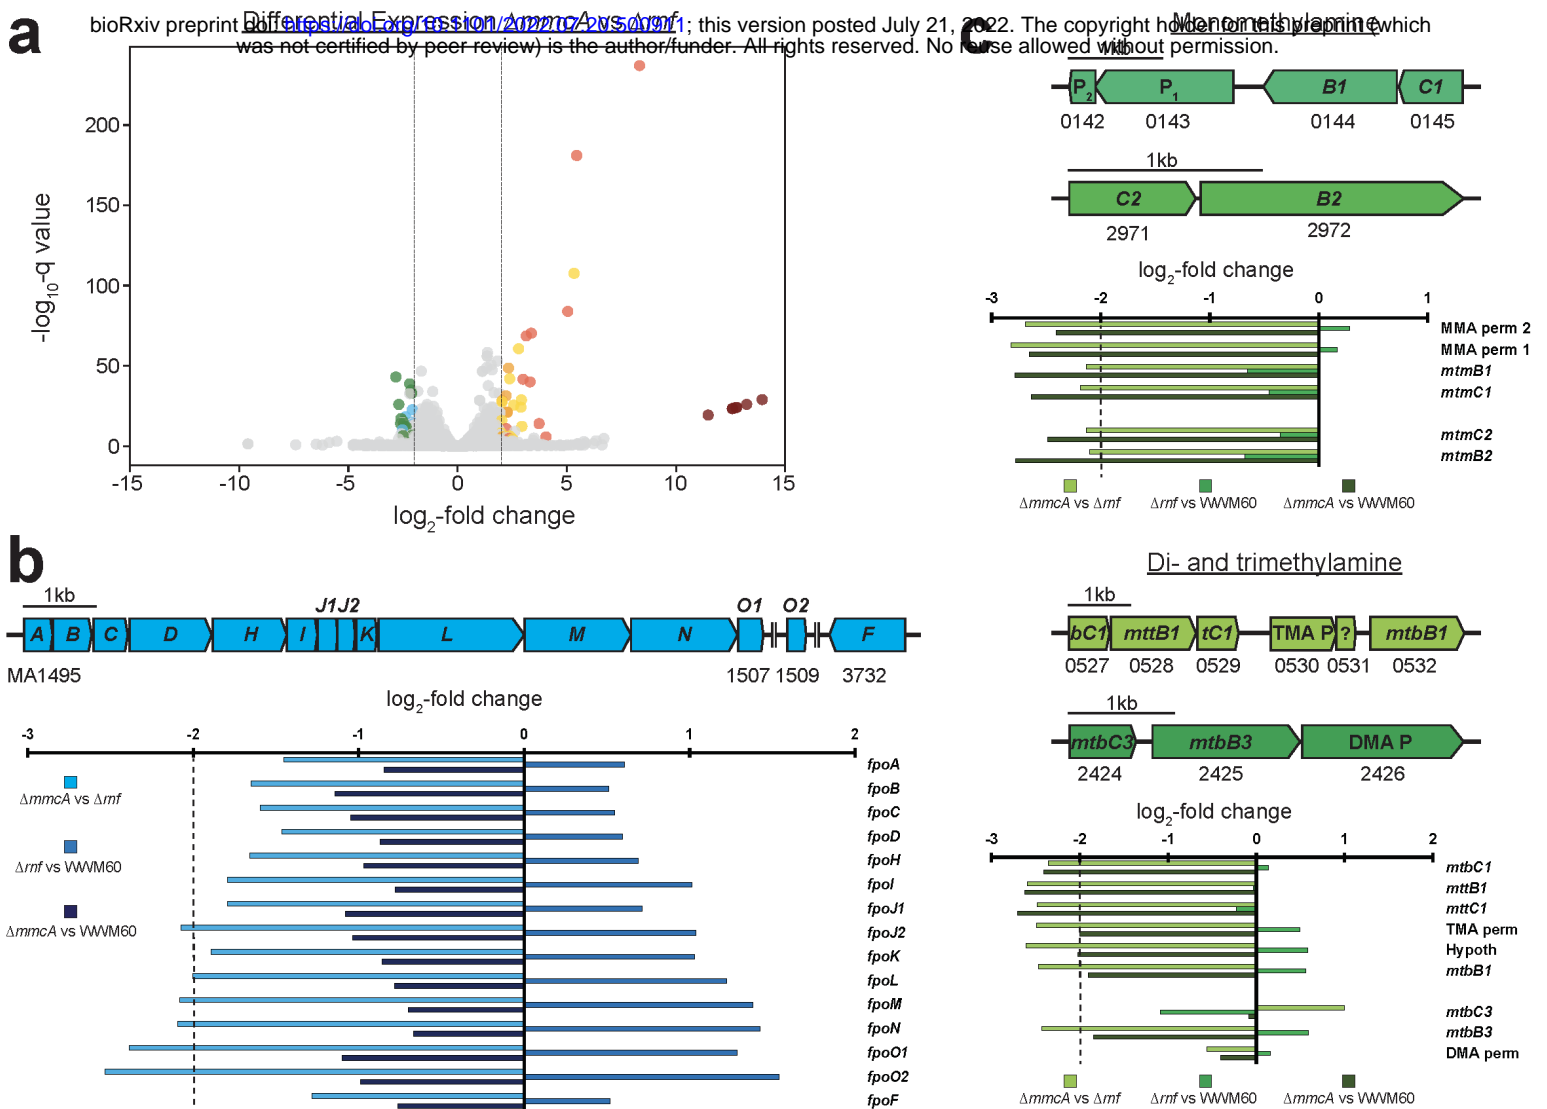

**Figure 5. a)** Volcano plot showing the differential expression of genes between the  $\Delta mmcA$  and  $\Delta rnf$  mutants. Genes with higher expression in the  $\Delta mmcA$  mutant have a positive  $\log_2$ -fold change value, while genes with higher expression in the  $\Delta rnf$  mutant have a negative  $\log_2$ -fold change value. Dashed lines on the plot delineate the cutoff for 'significant'  $\log_2$ -fold change in transcript abundance in either mutant. In the  $\Delta rnf$  mutant, two sets of genes are significantly more highly expressed: six subunits of the Fpo complex (shaded in blue), and multiple methylamine methyltransferases and permeases (shaded in green). Genes in orange have higher transcript levels in the  $\Delta mmcA$  mutant relative to both the  $\Delta rnf$  mutant and the parent strain (WWM60), genes in gold have significantly lower transcript levels in the  $\Delta rnf$  mutant relative to both the  $\Delta mmcA$  mutant and WWM60, whereas genes in red are uniquely upregulated in the  $\Delta mmcA$  mutant compared to the  $\Delta rnf$  mutant. The seven remaining genes of the Rnf complex in the  $\Delta mmcA$  mutant are shaded in maroon. **b)** Chromosomal organization of the thirteen-gene *fpo* operon in *M. acetivorans*, and the additional *fpoO2* and *fpoF* genes. Double vertical lines indicate genes are located more than 3 kbp away in the genome. The  $\log_2$ -fold change in transcript abundance for each gene in the Fpo complex for all pairwise comparisons between the  $\Delta mmcA$  mutant, the  $\Delta rnf$  mutant, and WWM60 are shown in the bar graph. The dashed line on the plot delineates the cutoff for 'significant'  $\log_2$ -fold change in transcript abundance. In the bar graph: light blue bars represent the expression in the  $\Delta mmcA$  mutant compared to the  $\Delta rnf$  mutant, with higher expression in the  $\Delta mmcA$  mutant denoted by a positive  $\log_2$ -fold change. Medium blue bars represent the expression in the  $\Delta rnf$  mutant compared to the parent strain, with higher expression in the  $\Delta rnf$  mutant denoted by a positive  $\log_2$ -fold change. Dark blue bars represent the expression in the  $\Delta mmcA$  mutant compared to the parent strain, with higher expression in the  $\Delta mmcA$  strain denoted by a positive  $\log_2$ -fold change. **c)** Chromosomal organization of four different methylamine methyltransferase loci. The  $\log_2$ -fold change in transcript abundance for each gene at the various loci for all pairwise comparisons between the  $\Delta mmcA$  mutant, the  $\Delta rnf$  mutant, and WWM60 are shown in the bar graphs. The dashed lines on the plots delineate the cutoff for 'significant'  $\log_2$ -fold change in transcript abundance. In both bar graphs: light green bars represent the expression in the  $\Delta mmcA$  mutant compared to the  $\Delta rnf$  mutant, with higher expression in the  $\Delta mmcA$  mutant denoted by a positive  $\log_2$ -fold change. Medium green bars represent the expression in the  $\Delta rnf$  mutant compared to the parent strain, with higher expression in the  $\Delta rnf$  mutant denoted by a positive  $\log_2$ -fold change. Dark green bars represent the expression in the  $\Delta mmcA$  mutant compared to the parent strain, with higher expression in the  $\Delta mmcA$  strain denoted by a positive  $\log_2$ -fold change.

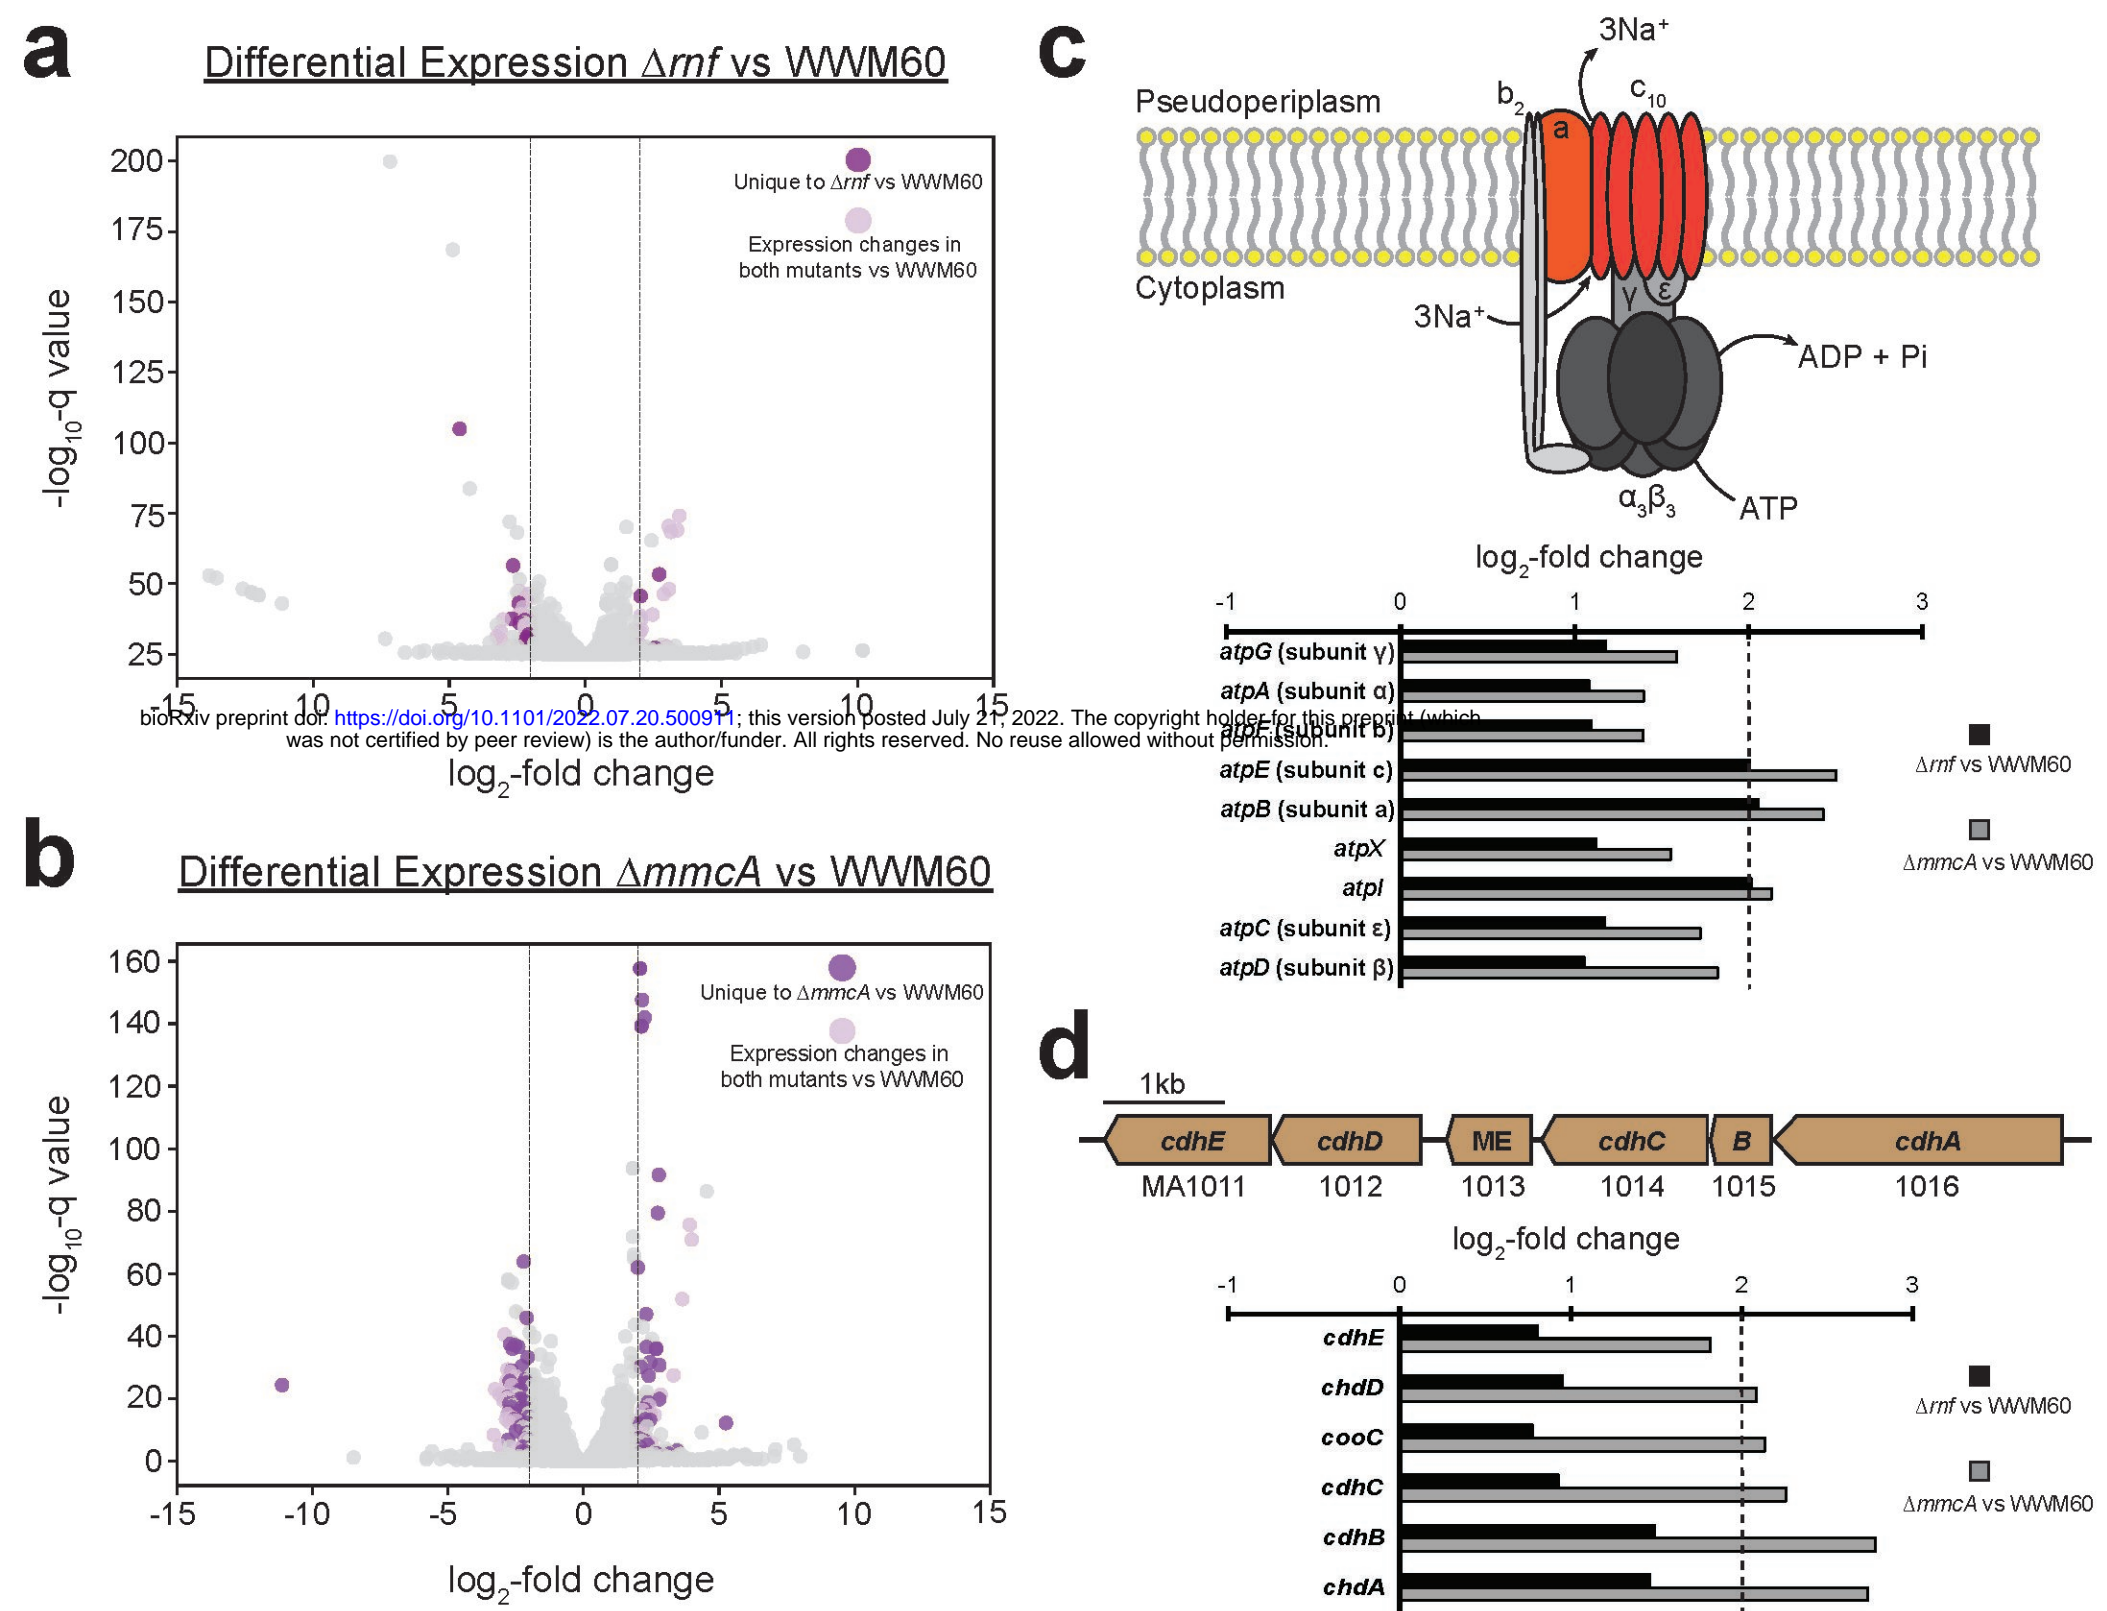

**Figure 6.** **a)** Volcano plot showing the differential expression of genes between the  $\Delta rnf$  and the parent strain (WWM60). Genes with higher expression in the  $\Delta rnf$  mutant have a positive  $\log_2$ -fold change value, while genes with higher expression in the parent have a negative  $\log_2$ -fold change value. Dashed lines on the plot delineate the cutoff for ‘significant’  $\log_2$ -fold change in transcript abundance in either strain. Genes in light purple are significantly differentially expressed in both the  $\Delta rnf$  and  $\Delta mmcA$  mutant relative to the WWM60. Genes in dark magenta have significant differential expression only in the  $\Delta rnf$  mutant relative to WWM60. **b)** Volcano plot showing the differential expression of genes between the  $\Delta mmcA$  and the parent strain (WWM60). Genes with higher expression in the  $\Delta mmcA$  mutant have a positive  $\log_2$ -fold change value, while genes with higher expression in the parent have a negative  $\log_2$ -fold change value. Dashed lines on the plot delineate the cutoff for ‘significant’  $\log_2$ -fold change in transcript abundance in either strain. Genes in light purple are significantly differentially expressed in both the  $\Delta rnf$  and  $\Delta mmcA$  mutant relative to the parent strain. Genes in dark purple have significant differential expression only in the  $\Delta mmcA$  mutant relative to the parent. **c)** Schematic of the  $\text{Na}^+$ -translocating F1F0 ATP synthase in *M. acetivorans*. ATP hydrolysis results in the translocation of three sodium ions across the cell membrane to maintain the sodium gradient in the absence of a fully functional Rnf complex (44). Subunits with significant fold change are shaded in orange. The  $\log_2$ -fold change in transcript abundance for every gene in the F1F0 ATP synthase between the  $\Delta rnf$  mutant (black bars) and the  $\Delta mmcA$  mutant (gray bars) compared to WWM60 are shown in the bar graph. The dashed line on the plot delineates the cutoff for a ‘significant’  $\log_2$ -fold change in transcript abundance. **d)** Chromosomal organization of the *cdh1* operon in *M. acetivorans*. The  $\log_2$ -fold change in transcript abundance for each gene in the *cdh1* operon between the  $\Delta rnf$  mutant (black bars) and the  $\Delta mmcA$  mutant (gray bars) compared to WWM60 are shown in the bar graph. The dashed line on the plot delineates the cutoff for a ‘significant’  $\log_2$ -fold change in transcript abundance.

**Table 1:** Growth data for WWM60, WWM1015 ( $\Delta rnf$ ) and DDN009 ( $\Delta mmcA$ ) on a range of different methanogenic substrates

| <i>M. acetivorans</i> strains                      | Doubling time (Td) (hrs) | Max.OD <sub>600</sub> (OD <sup>M</sup> ) | p-value for WT vs $\Delta rnf$ mutant (Td/OD <sup>M</sup> ) | p-value for WT vs $\Delta mmcA$ mutant (Td/OD <sup>M</sup> ) | p-value for $\Delta rnf$ vs $\Delta mmcA$ mutant (Td/OD <sup>M</sup> ) |
|----------------------------------------------------|--------------------------|------------------------------------------|-------------------------------------------------------------|--------------------------------------------------------------|------------------------------------------------------------------------|
| 50 mM Trimethylamine (TMA) as a growth substrate   |                          |                                          |                                                             |                                                              |                                                                        |
| WWM60 (WT)                                         | 14.94 ± 0.61             | 1.698                                    | 0.043/0.035                                                 | 0.001/0.355                                                  | 0.009/0.063                                                            |
| $\Delta rnf$                                       | 16.72 ± 0.86             | 1.485                                    | -                                                           | -                                                            | -                                                                      |
| $\Delta mmcA$                                      | 20.07 ± 0.40             | 1.632                                    | -                                                           | -                                                            | -                                                                      |
| 125 mM Methanol (MeOH) as a growth substrate       |                          |                                          |                                                             |                                                              |                                                                        |
| WWM60 (WT)                                         | 10.33 ± 0.23             | 1.899                                    | 8.7616E-06/0.001                                            | 9.0135E-06/0.002                                             | 0.001/0.783                                                            |
| $\Delta rnf$                                       | 18.58 ± 0.11             | 1.558                                    | -                                                           | -                                                            | -                                                                      |
| $\Delta mmcA$                                      | 25.09 ± 0.36             | 1.569                                    | -                                                           | -                                                            | -                                                                      |
| 40 mM Acetate as a growth substrate                |                          |                                          |                                                             |                                                              |                                                                        |
| WWM60 (WT)                                         | 79.48 ± 5.73             | -                                        | -                                                           | -                                                            | -                                                                      |
| $\Delta rnf$                                       | No growth                | -                                        | -                                                           | -                                                            | -                                                                      |
| $\Delta mmcA$                                      | No growth                | -                                        | -                                                           | -                                                            | -                                                                      |
| 20 mM Dimethyl sulfide (DMS) as a growth substrate |                          |                                          |                                                             |                                                              |                                                                        |
| WWM60 (WT)                                         | 26.48 ± 0.13             | -                                        | 0.023                                                       | 0.016                                                        | 0.057                                                                  |
| $\Delta rnf$                                       | 48.54 ± 5.90             | -                                        | -                                                           | -                                                            | -                                                                      |
| $\Delta mmcA$                                      | 67.14 ± 8.90             | -                                        | -                                                           | -                                                            | -                                                                      |

All data represent the mean ± standard deviation of at least 3 biological replicates  
p-values were determined using a two-sided t-test assuming unequal variances



**Table 2:** Growth data for WWM60, WWM1015 ( $\Delta rnf$ ) and DDN009 ( $\Delta mmcA$ ) on dimethylsulfide (DMS)

| <i>M. acetivorans</i> strains                     | Doubling time (Td) (hrs) | Lag time (hrs)     | p-value for WT vs $\Delta rnf$ mutant (lag time) | p-value for WT vs $\Delta mmcA$ mutant (lag time) | p-value for $\Delta rnf$ vs $\Delta mmcA$ mutant (lag time) |
|---------------------------------------------------|--------------------------|--------------------|--------------------------------------------------|---------------------------------------------------|-------------------------------------------------------------|
| Growth data for cells transferred from TMA to DMS |                          |                    |                                                  |                                                   |                                                             |
| WWM60 (WT)                                        | 36.37 $\pm$ 4.52         | 640.60 $\pm$ 51.61 | 0.004                                            | 0.367                                             | 0.009                                                       |
| $\Delta rnf$                                      | 53.16 $\pm$ 1.92         | 163.42 $\pm$ 13.91 | -                                                | -                                                 | -                                                           |
| $\Delta mmcA$                                     | 58.68 $\pm$ 5.91         | 590.22 $\pm$ 68.66 | -                                                | -                                                 | -                                                           |

All data represent the mean  $\pm$  standard deviation of at least 3 biological replicates
